1 **Unveiling cryptic diversity among Müllerian co-mimics: insights from the Western**  
2 **Palearctic *Syntomis* moths (Lepidoptera: Erebidae)**

3

4 **Authors:** Andrea Chiocchio<sup>1,2\*</sup>, Paola Arduino<sup>2</sup>, Rossella Cianchi<sup>3</sup>, Daniele Canestrelli<sup>2</sup>, Alberto Zilli<sup>4</sup>

5

6 **Full correspondence addresses:**

7 <sup>1</sup> Department of Biology, Lund University, Sölvegatan 37, 223 62 Lund, Sweden

8 <sup>2</sup> Department of Ecological and Biological Science, Università degli Studi della Tuscia, 01100 Viterbo, Italy

9 <sup>3</sup> Via Colle Lungo II Strada, 00039, Zagarolo, Italy

10 <sup>4</sup> Natural History Museum, Life Sciences, Cromwell Road, SW7 5BD London, UK

11

12 **Corresponding author:** \*andrea.chiocchio@biol.lu.se

13

14 **Running title:** Cryptic diversity among *Syntomis* moths

15

16

17

18

19

20

21

22

23

24

25

26

27

28

29        **Abstract**

30        Accurate species delimitation is of primary importance in biodiversity assessments and in reconstructing  
31 patterns and processes in the diversification of life. However, the discovery of cryptic species in virtually all  
32 taxonomic groups unveiled major gaps in our knowledge of biodiversity. Mimicry complexes are good  
33 candidates to source for cryptic species. Indeed, members of mimicry complexes undergo selective pressures  
34 on their habitus, which results in strong resemblance between both distantly and closely related species. In  
35 this study, we used a multi-locus genetic approach to investigate the presence of cryptic diversity within a  
36 group of mimetic day-flying moths whose systematics has long been controversial, the Euro-Anatolian  
37 *Syntomis*. Results showed incongruence between species boundaries and currently accepted taxonomy of the  
38 group. Both mitochondrial and nuclear markers indicate presence of four, well-distinct genetic lineages. The  
39 genetic distance and time of divergence between the Balkan and Italian populations of *S. marjana* are the  
40 same as those found between *S. phegea* and *S. ragazzii*, the last two being well-distinct, broadly  
41 sympatrically occurring species. The divergence between the two lineages of *S. marjana* dates back to the  
42 Early Pleistocene, which coincided with substantial changes in climatic conditions and vegetation cover in  
43 Southern Europe that have likely induced geographic and ecological vicariance. Our results show that the  
44 species richness of mimicry complexes inhabiting temperate regions might still be severely underestimated.  
45 *Syntomis* populations up to now designated as *S. marjana albionica*, *S. m. quercii* and *S. marjana kruegeri* s.  
46 str. are here considered to represent a separate species from nominate *marjana* and are distinguished as  
47 *Syntomis quercii* Verity, 1914, **bona sp., stat. nov.**

48        **Keywords:** cryptic species, mimicry, moths, speciation, *Syntomis*, *Zygaena*, Western Palearctic.

## 49 **Introduction**

50 Accurate species delimitation is of primary importance for understanding tempo and modes of species  
51 diversification (Wiens, 2007). Historically, new species have mainly been recognized using morphological  
52 trait variation (Wiens & Servedio, 2000). However, species can evolve even in absence of conspicuous  
53 morphological trait divergence, as shown by the discovery of the so-called cryptic species (Bickford *et al.*,  
54 2007). These had originally been spotted on the basis of subtle ecological or behavioural features (Mayr,  
55 1963), though the use of genetic markers to circumscribe biological species has nowadays boosted their  
56 discovery (Ayala & Powell, 1972; Knowlton, 1993; Beheregaray & Caccone, 2007; Carstens *et al.*, 2013).  
57 The recognition of cryptic species virtually across all taxonomic groups (Pfenninger & Schwenk, 2007),  
58 included many well-studied ones (Roca *et al.*, 2001; Fennessy *et al.*, 2016), unveiled major gaps in our  
59 knowledge of biological diversity (Beheregaray & Caccone, 2007; Struck *et al.*, 2018). These gaps in turn  
60 constrain our understanding of the mechanisms involved in biological diversification and in the  
61 establishment of interactions at the community level, and limit the deployment of measures in many areas of  
62 biodiversity management, from conservation biology to pest or disease control (Beheregaray & Caccone,  
63 2007; Balint *et al.*, 2011; Robuchon *et al.*, 2019).

64 Although cryptic species are widespread throughout the tree of life, they are over-reported in some  
65 groups, such as freshwater fishes, deep-sea clams, polychaetes, frogs, mites, parasitic insects and nematodes  
66 (reviewed in Perez-Ponce & Poulin, 2016). Cryptic species seem to be commoner in animals using non-  
67 visual mating signals (e.g. many frogs) and/or under selection promoting morphological stasis or convergent  
68 evolution (e.g. parasites) (Bickford *et al.*, 2007; Struck *et al.*, 2018). They are also common in cases of recent  
69 and/or rapid speciation, when short divergence time did not allow the accumulation of detectable phenotypic  
70 differences (Reidenbach *et al.*, 2012; Gustafsson *et al.*, 2014). However, numerous taxa characterized by life  
71 history traits likely encouraging cryptic diversification have been poorly investigated, and many of them are  
72 still analysed with a traditional morphological approach (Bickford *et al.*, 2007; Struck *et al.*, 2018). As a  
73 consequence, a clear picture of the distribution of cryptic species across the tree of life is still lacking.

74 Mimicry complexes are good candidate sources of cryptic species. In particular, cryptic species are  
75 expected among groups of closely related species involved a same Müllerian mimicry ring (Ruxtoun *et al.*,  
76 2004), or of look-alikes in masquerade rings (cf. Boppré *et al.*, 2017), as phenotypic divergence after

77 speciation is constrained by stabilizing selection on the shared warning signals (but see Lawrence *et al.*,  
78 2019). Interestingly, it was shown that look-alikeness among co-mimics can also be achieved secondarily via  
79 introgressive hybridization and incorporation of pattern-determining genes from related species (Giraldo *et*  
80 *al.*, 2008; Pardo-Diaz *et al.*, 2012; Jiggins, 2017). The imbalance between species divergence and phenotypic  
81 divergence is a prerequisite for the evolution of cryptic species (Struck *et al.*, 2018). Thus, species involved  
82 in mimicry complexes provide a good testing ground to study the contrasting effects of divergence and stasis  
83 in the evolution of cryptic species. However, the systematics of these species often results still inaccurate or  
84 partial, especially if exclusively based on external morphology. As a matter of fact, the presence of cryptic  
85 species within mimicry complexes has been reported almost exclusively for some well-studied tropical taxa,  
86 which provided excellent insights on how mimicry can affect patterns of diversification and speciation  
87 (Pfennig, 2012, and references therein; Jiggins, 2017). Yet mimicry complexes are not limited to the tropical  
88 regions.

89 In this study, we investigated the presence of cryptic species within a group of mimetic moths occurring  
90 in temperate regions whose systematics has long been controversial, the Euro-Anatolian *Syntomis*. These are  
91 distasteful, day-flying moths showing aposematic colorations which belong to a Müllerian mimicry complex  
92 including also several unrelated co-mimics, e.g. yellow morph of *Zygaena ephialtes*, *Z. transalpina*  
93 (*Zygaenidae*) and possibly *Callimorpha dominula* (*Erebidae*) (Bullini *et al.*, 1969; Sbordoni *et al.*, 1979;  
94 Zilli, 1996). Being mainly based on features of the habitus and genital morphology (Obraztsov, 1966), the  
95 taxonomy of *Syntomis* moths appears to be outdated and confused, evidently flawed by incorrect delimitation  
96 of real species boundaries - here we consider *Syntomis* as a genus distinct from *Amata* on the basis of  
97 information provided by Schneider *et al.* (1999). In particular, we focused on *S. marjana*, a species which  
98 ranges from Provence, Sicily and continental Italy across the Balkan Peninsula, Ukraine and Southern  
99 European Russia eastwards to Northern Caucasus (Freina, 2008; Fibiger *et al.*, 2011). Based on their disjunct  
100 distribution, and occasionally on some slight morphological differences in size, male genitalia, wing shape  
101 and spotting, some populations have occasionally been considered as distinct species, above all *albionica*  
102 (Provence), *quercii* (Apennines), *kruegeri* (Sicily), *marjana* (Balkans) and *sheljuzhkoii* (Caucasus) (Verity,  
103 1914; Turati, 1917; Stauder, 1928-1929; Obraztsov, 1966; Dufay, 1970; Ignatiev & Zolotuhin, 2005).  
104 Preliminary genetic studies showed substantial divergence between two populations of the taxa *kruegeri* (Mt

105 Pellegrino, Palermo, Sicily) and *marjana* (Stari Grad, Croatia), which were then not considered to be  
106 conspecific (Cianchi *et al.*, 1980; Bullini *et al.*, 1981). Nevertheless, this genetic evidence has subsequently  
107 been challenged by Freina & Witt (1987) and was not considered anymore in recent taxonomic reviews,  
108 which recognized only a single widely distributed species with more subspecies (Freina, 2008; Fibiger *et al.*,  
109 2011). Such ongoing discordance on the systematics of the group claims for more comprehensive genetic  
110 investigations.

111 Here we provide the first extensive assessment of the genetic variation across a number of Euro-Anatolian  
112 *Syntomis* taxa. Firstly, we assessed the genetic variation at both nuclear and mitochondrial markers within  
113 the *S. marjana-kruegeri* complex and in another two closely related, sympatrically occurring species, *S.*  
114 *phegea* and *S. ragazzii*; then, we performed ordination-based clustering analyses and used species  
115 delimitation methods to circumscribe putative species; finally, we compared the estimated time of  
116 divergence among sympatric and allopatric taxa. The aim of this paper is thence to clarify the taxonomy and  
117 systematics of a number of Western Palaearctic *Syntomis* taxa and disclose the extent of cryptic diversity  
118 within a mimicry complex occurring in temperate areas.

119

## 120 **Materials and Methods**

### 121 *Sampling and laboratory procedures*

122 The sampling strategy was designed to capture the most of geographic variation from the *Syntomis*  
123 *marjana - kruegeri* complex, *S. ragazzii* and *S. phegea*. We analysed a total of 1150 specimens from 34  
124 localities representing most of the described subspecies (we did not analyse *S. m. odessana*, *S. m. sheljuzhkoi*  
125 and *S. p. phegea*). Details about sampling localities and sample sizes are given in Tab. 1 and Fig. 1.  
126 Specimens were preliminarily identified following the characters described in Obraztsov (1966), Freina &  
127 Witt (1987) and Fibiger *et al.* (2011). Biological tissue was stored at -80° until subsequent analyses. We also  
128 obtained two dry specimens from the related species *S. nigricornis* and *S. aequipunta* for use in the  
129 phylogenetic analysis (see below).

130 Standard horizontal starch gel (10%) electrophoresis was performed to analyse the genetic variation at 22  
131 allozyme loci:  $\alpha$ -glycerol phosphate dehydrogenase ( *$\alpha$ -Gpdh*), malate dehydrogenase (*Mdh-1* and *Mdh-2*),  
132 isocitrate dehydrogenase (*Idh-1* and *Idh-2*), 6-phosphogluconate dehydrogenase (*6Pgdh*), glyceraldehyde-3-

133 phosphate dehydrogenase (*Gapdh*), superoxide dismutase (*Sod-1* and *Sod-3*), xanthine dehydrogenase (*Xdh*),  
134 hexokinase (*Hk-1* and *Hk-2*), adenylate kinase (*Adk*), esterase (*Est-1*, *Est-2* and *Est-5*), acid phosphatase  
135 (*Acph*), aldolase (*Ald*), aconitase (*Aco*), triosephosphate isomerase (*Tpi*), mannose phosphate isomerase  
136 (*Mpi*), and phosphoglucomutase (*Pgm*).

137 Electrophoretic techniques and staining procedures followed Selander *et al.* (1971), Ayala *et al.* (1972)  
138 and Harris & Hopkinson (1976), with minor modifications. Alleles were numbered according to their  
139 mobility (expressed in mm) with respect to the most common allele (named 100) in a reference population  
140 (*S. phegea* from Camerata Nuova, Central Italy).

141 DNA was extracted from the legs of a subsample of available specimens (Tab. 1) following the standard  
142 cetyltrimethylammonium-bromide (CTAB) protocol (Doyle & Doyle, 1990). A fragment from the  
143 mitochondrial Cytochrome Oxidase I gene (*COI*) was amplified and sequenced. The polymerase chain  
144 reaction (PCR) primers were REVNANCY (5'-GAA GTT TAT ATT TTA ATT TTA CCG GG-3) and  
145 PAT2K837 (5'-TCC ATT ACA TAT AAT CTG CCA TAT TAG-3') from Simon *et al.* (1994).  
146 Amplifications were performed in a 10- $\mu$ L reaction volume containing MgCl<sub>2</sub> (2 mM), four dNTPs (0.2 mM  
147 each), two primers (0.2  $\mu$ M each), the enzyme *Taq* polymerase (0.5 U, Promega), its reaction buffer (1X,  
148 Promega) and 10–100 ng of DNA template. PCR runs were conducted following an initial step at 95°C for 5  
149 min, then 32 cycles at 94°C for 1 min, 45 sec at 57°C (*COI*) and 1 min at 72°C, followed by a single final  
150 step at 72°C for 5 min. Purification and sequencing of PCR products were conducted on both strands by  
151 Macrogen Inc. (<http://www.macrogen.com>), using an ABI PRISM<sup>®</sup> 3730 sequencing system (Applied  
152 Biosystems). All sequences have been deposited in GenBank (accession numbers: XXXX).

### 153 *Allozyme data analysis*

154 The effective number of alleles per locus was calculated with software GENALEX (Peakall & Smouse,  
155 2006). Allele frequencies, mean observed and expected heterozygosity and proportion of polymorphic loci  
156 were computed for each sampling site (population) using BIOSYS-2 (Swofford & Selander 1999). BIOSYS-  
157 2 was also used to evaluate departures from the expected Hardy-Weinberg equilibrium for each locus at each  
158 sampling site, and the linkage equilibrium between each pair of loci after application of the Bonferroni  
159 correction for multiple tests. As no departures from Hardy-Weinberg equilibria were observed, indicating  
160 occurrence of panmixia in all populations, we conducted a population-based assessment of genetic affinities.

161 A pairwise matrix of unbiased Nei's genetic distances (Nei, 1978) among all population samples was  
162 computed by BIOSYS-2. Clustering of populations was assessed via Principal Coordinate Analysis (PCoA)  
163 of Nei's distances among populations, as implemented in GENALEX. PCoA-defined clusters were then  
164 compared with candidate taxa and a matrix of fixed differences (i.e. fully diagnostic loci) among them was  
165 generated.

#### 166 *Sequence data analysis, species delimitation and phylogenetic reconstruction*

167 Electropherograms of sequence data were visually checked using FinchTV 1.4.0 (Geospiza Inc.), and  
168 sequences were aligned using Clustal X 2.0 (Larkin *et al.*, 2007). Nucleotide variation was assessed using  
169 MEGA 6.0 (Tamura *et al.*, 2013); haplotype and nucleotide diversity were estimated using DnaSP 5.10  
170 (Librado & Rozas, 2009).

171 We applied three different species delimitation methods which are traditionally employed to delimit  
172 groups of sequences that potentially correspond to distinct species: (i) Automatic Barcode Gap Discovery  
173 (ABGD; Puillandre *et al.*, 2012a), that detects gaps in the distribution of pairwise genetic distances,  
174 assuming that it corresponds to a threshold between intra- and inter-specific distances; (ii) General Mixed  
175 Yule Coalescent model (GMYC; Pons *et al.*, 2006), which starts from an ultrametric tree and tests whether  
176 the branching rates fit better with a coalescent model or a speciation model, using the transition point  
177 between speciation and coalescence to delimit species; and (iii) Bayesian implementation of the Poisson Tree  
178 Processes (bPTP; Zhang *et al.*, 2013), which also compares speciation and coalescent models but relies on  
179 the substitution rates calculated for each node instead of the branching rates. These three methods were  
180 chosen because they proved to be effective in recognizing cryptic species either in large and small groups of  
181 sequences and are among the most widely used with mtDNA data, also in single gene analyses (Fujita *et al.*,  
182 2012; Puillandre *et al.*, 2012a, 2012b; Zhang *et al.*, 2013; Schwarzfeld & Sperling, 2015).

183 ABGD analysis was performed on the ABGD webserver platform  
184 (<http://www.abi.snv.jussieu.fr/public/abgd/abgdweb.html>), using the default parameters (gap width  $X = 1.5$ ,  
185 prior intraspecific divergences from  $P = 0.001$  to  $P = 0.1$ , with 20 steps) and the Kimura-2-parameter (K80)  
186 model to compute a pairwise genetic distance matrix. The phylogenetic tree used as input for the GMYC and  
187 bPTP analyses was generated using the Bayesian method implemented in BEAST 1.8.1 (Bayesian  
188 evolutionary analysis by sampling trees; Drummond *et al.*, 2012). We selected the Yule pure-birth speciation

189 model as tree prior, a strict clock model, and the best-fit model of molecular evolution estimated by  
190 Jmodeltest 2.1.3 (Darriba *et al.*, 2012) under the Bayesian Information Criterion, i.e. the TIM2 transitional  
191 model with a proportion of invariant sites (+I); the Markov chain Monte Carlo (MCMC) length was 10  
192 million generations, sampling trees every 1000 generations. The independence of the effective sample size  
193 (ESS values »200) for the estimated parameters was evaluated using Tracer 1.6, after removing the first 10%  
194 of samples as burn-in. The consensus tree was then generated by TreeAnnotator 1.8.1 (BEAST package),  
195 using the maximum clade credibility criterion, after removing the first 1000 sampled trees as burn-in. We  
196 included in the analysis also the sequences of *S. nigricornis* and *S. aequipuncta*. The GMYC analysis was  
197 then ran using the *splits* R package (Ezard *et al.*, 2015), applying both the single threshold and the multiple  
198 threshold methods. bPTP analysis was conducted on the webserver platform (<https://species.h-its.org/ptp/>),  
199 with a 100000 MCMC length and a 10% burn-in.

200 The phylogenetic relationships among the candidate species was inferred using maximum likelihood  
201 (ML) and Bayesian methods. The ML-tree was generated using the algorithm implemented in IQTREE  
202 (Nguyen *et al.*, 2014) applying the TIM2+I model of substitution; the robustness of the inferred tree topology  
203 was assessed using the non-parametric bootstrap method with 1000 pseudo-replicates and the SH-like  
204 approximate likelihood ratio test (SH-aLRT), also with 1000 bootstrap replicates. The Bayesian phylogenetic  
205 analysis was performed using the time-calibrated procedure implemented in BEAST 1.8.1 (Drummond and  
206 Rambaut, 2007), in order to get a comparative framework of the times of divergence among the candidate  
207 species and to get an approximate historical contextualization of the speciation events. In absence of internal  
208 calibration points derived from fossil data or geologic events directly linked to the evolutionary history of  
209 *Syntomis*, to time-calibrate the tree we used an uncorrelated relaxed clock model and a fixed substitution rate  
210 of 0.0015 per site per million of years, i.e. the mean COI substitution rate estimated for arthropods by  
211 Brower *et al.* (1994). Despite the use of non-fossil-based calibrations is usually discouraged (Schenk, 2016),  
212 this option is often the only available for most of soft-bodied invertebrates, and continues to be extensively  
213 used in dating divergences in insects, including Lepidoptera (e.g. Hinojosa *et al.*, 2018). We chose the  
214 substitution rate by Brower (1994) among the several available ones (Papadopoulou *et al.*, 2010) since it falls  
215 in the middle of the ranges estimated for this gene fragment in insects, and it is so far the most used,  
216 facilitating comparative inferences. The Yule pure-birth speciation model was chosen as tree prior, and the



217 TIM2+I as substitution model. Two independent runs were performed, each with a Markov chain Monte  
218 Carlo (MCMC) length of 10 million generations, with sampling every 1000 generations. The independence  
219 of the estimated parameters (ESS values >200) and the convergence between runs were evaluated using  
220 Tracer 1.6, after removing the first 10% of samples as burn-in. The two runs were combined using  
221 LogCombiner 1.8.1 (BEAST package), and an annotated maximum clade credibility tree was computed with  
222 TreeAnnotator 1.8.1.

223

## 224 **Results**

### 225 *Allozyme data analysis*

226 Among the 22 loci analysed, four (*Sod-1*, *Sod-3*, *α-Gpdh*, *Gapdh*) resulted monomorphic in all studied  
227 populations. The allele frequencies at the 18 polymorphic loci are given in the Supplementary Table 1. The  
228 overall number of alleles observed at each polymorphic locus varied from two to nine (*Pgm*). No departures  
229 from both the Hardy-Weinberg and linkage equilibria were observed (no significant value after the  
230 Bonferroni correction). The mean sample size per locus, the effective number of alleles and the observed and  
231 expected heterozygosity for each population are shown in Tab. 1. The mean sample size ranged from 3.5  
232 (pop. 28) to 38.1 (pop. 6), the average number of alleles per locus varied from 1.1 (several samples) to 1.5  
233 (pop. 8, *S. phegea* from Monte Faito, and pop. 15, *S. ragazzii* from Monte Faito), the mean observed  
234 heterozygosity ranged from 0.006 (pop. 2, *S. phegea* from Capriana) to 0.097 (pop. 34, *S. marjana* from Stari  
235 Grad), the mean expected heterozygosity ranged from 0.006 (pop. 2, *S. phegea* from Capriana) to 0.095 (pop.  
236 16, *S. ragazzii* from Roccamandolfi).

237 The pairwise matrix of population genetic distances D (Nei, 1978) is given in Supplementary Tab. 2,  
238 whereas a heatmap of the D values is shown in Fig. 2. The inspection of the heatmap revealed four main  
239 clusters of populations with lower values of genetic distance, which coincided with populations of *S. phegea*,  
240 *S. ragazzii*, *S. m. marjana*, and *S. m. kruegeri* + *S. m. quercii* + *S. m. albionica*. The mean genetic distances  
241 observed within these groups are 0.002, 0.013, 0.013 and 0.017, respectively, which are values commonly  
242 observed at the intraspecific level (Bullini & Sbordoni, 1980). The mean genetic distances among these  
243 groups range from 0.338 (*S. phegea* vs. *S. m. marjana*) to 0.629 (*S. ragazzii* vs. *S. m. kruegeri* + *S. m. quercii*  
244 + *S. m. albionica*); the genetic distance between *S. m. marjana* and *S. m. kruegeri* + *S. m. quercii* + *S. m.*

245 *albionica* was 0.432; these values agree with those commonly observed among closely related species  
246 (Bullini & Sbordoni, 1980). The highest values of genetic distance observed within groups are 0.076,  
247 between southern (pop. 34, Stari Grad) and northern (pop. 31, Sgonico) population of *S. m. marjana*, 0.075,  
248 between *S. m. kruegeri* (pop. 28, Rocca Busambra) and *S. m. quercii* (pop. 24, Aschi Alto), and 0.063,  
249 between *S. r. asperomontana* (pop. 21, S. Stefano in Aspromonte) and *S. r. ragazzii* (pop. 16,  
250 Roccamandolfi); these values agree with those commonly observed among subspecies (Bullini & Sbordoni,  
251 1980). A summarized matrix of the mean genetic distances observed within and between these groups is  
252 given in Tab. 3.

253 The ordination-based clustering analysis resulting from PCoA also defined four main clusters of  
254 populations (Fig. 2). The first and second PCoA axes explained 40.48% and 34.10% of total variance,  
255 respectively. Populations of *S. m. kruegeri* + *S. m. quercii* + *S. m. albionica* were grouped together in a  
256 distinct and well-defined cluster with respect to populations of *S. m. marjana*, which were also combined  
257 into a single cluster; the other two clusters coincided with populations of *S. phegea* and *S. ragazzii*.

258 The four clusters were also defined by some fully diagnostic loci, resumed in Tab. 3. We found four  
259 100% diagnostic loci between *S. phegea* and *S. m. marjana*, five between *S. marjana* and *S. m. kruegeri* + *S.*  
260 *m. quercii* + *S. m. albionica*, five between *S. m. marjana* and *S. ragazzii*, seven between *S. ragazzii* and *S. m.*  
261 *kruegeri* + *S. m. quercii* + *S. m. albionica*, seven between *S. ragazzii* and *S. phegea*, and nine between *S.*  
262 *phegea* and *S. m. kruegeri* + *S. m. quercii* + *S. m. albionica*.

### 263 *Sequence data*

264 We successfully amplified and sequenced a 781 bp fragment from the final section of the mitochondrial  
265 COI gene from 38 *Syntomis* individuals. No indels, stop codons or non-sense codons were observed. We  
266 found 16 different haplotypes defined by 81 (10.3%) variable positions, of which 68 (8.7%) were parsimony  
267 informative. The mean haplotype diversity ( $h$ ) and nucleotide diversity ( $\pi$ ) values for this dataset were 0.950  
268 ( $\pm 0.021$  SD) and 0.032 ( $\pm 0.008$  SD), respectively. A full list of the haplotype founds within each studied  
269 population, with the respective GenBank accession numbers, is presented in Tab. 1.

270 The results from the species delimitation analyses using ABGD, GMYC and bPTP are resumed in Tab. 2.  
271 ABGD recognized a gap in the pairwise distance distribution between 0.013 and 0.035. Taking the prior  
272 maximal distance ( $P_{\max}$ ) threshold within this gap, ABGD computed a primary partition with six groups,

273 coinciding with *S. phegea*, *S. ragazzii*, *S. m. marjana*, *S. m. kruegeri* + *S. m. quercii* + *S. m. albionica*, *S.*  
274 *nigricornis* and *S. aequipuncta*. The secondary partition, achieved by the recursive analysis, recognized the  
275 same groupings when using  $P_{\max}$  values included in the gap; further splits were recognized for lower values:  
276 northern *S. m. marjana* from southern *S. m. marjana* (for  $P_{\max} = 0.0077$ ), and *S. m. kruegeri* from *S. m.*  
277 *albionica* + *quercii* (for  $P_{\max} = 0.0046$ ).

278 GMYC single-threshold analysis rejected the null hypothesis of a coalescent model (likelihood ratio  
279 6.415; LR test: 0.04, significant) and recognized six candidate species, which coincided with those recovered  
280 from ABGD analyses. The multiple-threshold analysis also rejected the coalescent model (likelihood ratio  
281 6.873; LR test: 0.03, significant), but suggested further splits between northern and southern *S. m. marjana*  
282 and between *S. m. kruegeri* and *S. m. albionica* + *quercii* (as in ABGD analysis).

283 Finally, bPTP returned eight putative species, coinciding with *S. nigricornis* (support = 1.0), *S.*  
284 *aequipuncta* (support = 1.0), *S. phegea* (support = 1.0), *S. ragazzii* (support = 0.79), northern *S. m. marjana*  
285 (support = 0.87), southern *S. m. marjana* (support = 0.94), *S. m. kruegeri* (not supported) and *S. m. albionica*  
286 + *quercii* (not supported).

287 The ML-tree retrieved by IQTREE (log-likelihood score: -1608.30, s.e. 61.93) recognized six main  
288 branches, which were consistent with results obtained from the species delimitation methods (Fig. 3A). The  
289 sequences of the taxa *kruegeri*, *quercii* and *albionica* clustered together (high support = 96.4/98%), and  
290 resulted the sister clade (high support = 87.4/88%) of *S. m. marjana* clade (high support = 98/100%). The  
291 sequences of *S. ragazzii* form a unique supported cluster (high support = 96.5/79%), which resulted more  
292 related to *S. nigricornis* (moderate support = 80/66%) than *S. phegea*, whereas *S. phegea* resulted more  
293 related to *S. aequipuncta* albeit with weak support (77/54%).

294 The time-calibrated phylogenetic analysis conducted in BEAST returned two congruent runs that fully  
295 converged to a stationary distribution with satisfactory ESS values ( $>>200$ ) for all the parameters of interest.  
296 A chronogram based on the maximum clade credibility (MCC) tree is presented in Fig. 3B. The tree  
297 topology was consistent with both the ML-tree and the species delimitation analyses, as it showed six main  
298 branches coinciding with *S. phegea*, *S. aequipuncta*, *S. nigricornis*, *S. ragazzii*, *S. m. kruegeri* + *S. m. quercii*  
299 + *S. m. albionica* and *S. m. marjana*. The time to the most recent common ancestor (MRCA) for all the  
300 analysed taxa was estimated at 2.87 million years ago (mya) (95% HPD:1.87 – 4.12); that between *S. m.*

301 *kruegeri* + *S. m. quercii* + *S. m. albionica* and *S. m. marjana* at 1.99 mya (95% HPD: 1.11 – 2.96), roughly  
302 the same as that between *S. phegea* and *S. aequipuncta* (mean: 1.92 mya, 95% HPD: 0.93 – 3.05), and higher  
303 than that estimated for *S. ragazzii* and *S. nigricornis* (mean: 1.29, 95% HPD: 0.66 – 2.07). The estimated  
304 TMRCA for the clades coinciding with *S. m. marjana*, *S. m. kruegeri* + *S. m. quercii* + *S. m. albionica* and *S.*  
305 *ragazzii* were 0.61 mya (95% HPD: 0.26 – 1.1), 0.37 mya (95% HPD: 0.10 – 0.76) and 0.36 mya (95% HPD:  
306 0.08 – 0.67), respectively.

307

## 308 **Discussion**

309 Both mitochondrial and nuclear markers consistently supported the existence of two distinct, highly  
310 differentiated, genetic clusters within *S. marjana*, distributed West and East of the Adriatic Sea. The extent  
311 of the genetic differentiation between these two clusters and the estimated time of their divergence are of the  
312 same magnitude of those occurring among other well-recognized species of this complex. Furthermore, all  
313 species delimitation methods clearly point to these two genetic clusters as distinct species. These results are  
314 consistent with preliminary evidence showing substantial genetic divergence between the taxa *kruegeri* and  
315 *marjana* s. str. (Cianchi *et al.*, 1980, Bullini *et al.*, 1981), and suggest to consider the populations of the  
316 lineage *kruegeri* + *quercii* + *albionica* as a distinct species, under the oldest available name taking priority,  
317 that is *S. quercii* Verity, 1914 (see below). Our data also highlight further genetic sub-structuring at  
318 intraspecific level, suggesting a role for recent Pleistocene events in triggering population-level genetic  
319 differentiation.

320 The taxa *kruegeri*, *marjana* and *quercii* were originally described as aberrations or subspecies of other  
321 species, the first two of *S. phegea* (Ragusa, 1904; Stauder, 1913), the last one of *S. mestratii*, a species from  
322 the Middle East. Subsequently, *kruegeri* and *marjana* were both considered to be valid species by Turati  
323 (1917), who however ranked *quercii* as a subspecies of *marjana*. However, the strong similarity of these  
324 species in habitus, habitat preferences (dry grasslands) and phenology, together with the difficulties in  
325 identifying fully reliable diagnostic characters, led most authors to combine them into a unique polytypic  
326 species (Obraztsov, 1966; Bertaccini *et al.*, 1997; Ignatiev & Zolotuhin, 2005; Freina, 2008; Fibiger *et al.*,  
327 2011). Despite their strong similarity, we detected substantial genetic differentiation between *S. marjana* and  
328 *S. quercii* (as aforementioned comprising herein also the taxa *albionica* and *kruegeri*) that can be attributed

329 to a speciation event occurred at some point in the Early Pleistocene or before. Our estimate of the  
330 divergence time between these two lineages is probably biased by the use of a non-fossil-based calibration of  
331 the molecular clock (Papadopoulou *et al.*, 2010; Schenk, 2016), but it provides an approximate timing of  
332 their split. Indeed, the strong changes in bioclimatic conditions that characterized the Plio-Pleistocene  
333 transition prompted speciation in several temperate species inhabiting the Mediterranean peninsulas (Hewitt,  
334 1996, 2011), including Lepidoptera (Schmitt, 2007), and likely affected also the evolutionary history of the  
335 European *Syntomis*. These changes consisted of a generalized increase of aridity and a reduction of the forest  
336 habitats in Southern Europe (Hewitt, 2011), followed by the beginning of glacial cycles, that resulted in  
337 alternate expansion and retreat of xeric and forest habitats (Faquette *et al.*, 1999; Suc & Popescu, 2005;  
338 Abrantes *et al.*, 2010). Most European *Syntomis* are thermophilous (with the partial exception of *S. phegea*),  
339 occur in dry habitats, and are distributed in South-Eastern Europe with a number of relatives in steppe areas  
340 from the Middle-East to Central Asia, that likely represents the centre of origin of this group (“*phegea*-  
341 Gruppe” of Obraztsov, 1966). The common ancestor of *S. marjana* and *S. quercii* might have benefited from  
342 the increase of aridity in Western Europe at the end of Pliocene (Malatesta, 1985; Faquette *et al.*, 1999) by  
343 spreading over South-Eastern Europe. Then, with the advent of the first glacial cycle at the beginning of  
344 Pleistocene, the cooler conditions and the spreading of broad-leaved forests in the Italian and Balkan  
345 Peninsulas (Abrantes *et al.*, 2010) could have trapped the ancestor in the south of both peninsulas, where  
346 populations would have found relatively hot and dry refugia. This vicariance process has been claimed as the  
347 most likely explanation for the existence of several sibling species pairs with allo-parapatric distribution in  
348 the Italian and Balkan peninsulas (Racheli & Zilli, 1985). The Isonzo river in NE Italy and Slovenia, which  
349 virtually separates the distribution of these species, has been considered as a suture zone and biogeographical  
350 boundary for several vertebrate and invertebrate species (Taberlet *et al.*, 1998; Hewitt, 1999). However, in  
351 our case is hard to define a boundary between these two species because most of the historically known  
352 populations just west of that river have not been found anymore over the last 50 years and could not be  
353 genotyped. Further genetic assays on museum specimens are therefore required.

354 Pleistocene climatic changes do also support the origin of genetic sub-structuring of conspecific  
355 populations. Despite our data do not allow fine-scale phylogeographic inferences, they clearly reveal genetic  
356 sub-structuring in *S. quercii*, *S. ragazzii* and *S. marjana*, which can be explained by the interaction between

357 climate fluctuations and the physiographic heterogeneity of the Italian and Balkan peninsulas. We found  
358 genetic differentiation between the Sicilian and the Apennine populations of *S. quercii*, between the Central  
359 and southernmost Apennine populations of *S. ragazzii*, and between the northern and the southern  
360 populations of *S. marjana* s. str. (Fig. 3 and Supplementary Tab. 2). Substantial intraspecific differentiation  
361 between Sicilian and mainland populations and between the southernmost and Central Apennine populations  
362 is commonly observed in phylogeographic studies of numerous Italian species (Canestrelli *et al.*, 2008;  
363 2010; Chiocchio *et al.*, 2019; Scalercio *et al.*, 2019). These patterns are ascribable to the presence of several  
364 geographic discontinuities that acted as ecological and physiographic barriers at some point in the past, after  
365 a “refugia-within-refugia” scenario (Gomez & Lunt, 2007). During Pleistocene, the southernmost section of  
366 the Italian Peninsula and Sicily have been affected by several glacio-eustatic oscillations of the sea level that  
367 deeply influenced the genetic structure of populations (Bonfiglio *et al.*, 2002). This scenario also fits well  
368 with the genetic structure observed in *S. ragazzii* and *S. quercii*. In contrast, no apparent paleogeographic  
369 evidence supports the genetic differentiation observed within *S. marjana* in a relatively restricted area along  
370 the NE Adriatic with no evident orographic discontinuity. However, this area is interested by geological  
371 discontinuities (Cvetkovic *et al.*, 2015) that affect ground water availability and, as a consequence,  
372 vegetation and bioclimatic conditions (DMEER, 2017). These bioclimatic discontinuities likely represented  
373 ecological barriers for *S. marjana* populations which may have limited their gene flow, at least during the  
374 last part of the Pleistocene.

375 In the phylogenetic relationships outlined by mitochondrial DNA, noteworthy is the recovery of *S.*  
376 *ragazzii* as more closely related to the Anatolian-Caucasian *S. nigricornis* than *S. phegea*, despite *S. ragazzii*  
377 and *S. phegea* were long considered as sibling species and can still occasionally hybridize (Sbordoni *et al.*,  
378 1982). Vicariance between Southern Apennine and Anatolian taxa is fairly common in Lepidoptera and can  
379 be ascribed to several biogeographic processes (Racheli & Zilli, 1985) other than a direct geological  
380 connection between the two regions, the last of which is estimated in the late Miocene (Rögl *et al.*, 1999).  
381 Interestingly, the divergence between these two species has been estimated to be more recent than those  
382 between the other sister pairs. However, more samples of *S. nigricornis* and other middle-eastern taxa are  
383 strongly needed to infer the whole biogeographic history of this connection. Furthermore, the weak support  
384 values recovered for the relationship of *S. phegea* and *S. aequipuncta* with the lineages of *quercii-marjana*

385 and *ragazzii-nigricornis* stress the need to broaden the analysis to more genetic markers and species in order  
386 to fully resolve the evolutionary history of the Western Palearctic *Syntomis* (see also Przybyłowicz *et al.*,  
387 2019).

388 Our results highlight that in Euro-Anatolian *Syntomis* the degree of genetic divergence is not related with  
389 that of phenotypic divergence, as expected for species involved into mimicry complexes. These moths  
390 happen thus to be at the crossroad between independent evolutionary divergence and constraints limiting  
391 their phenotypic diversification (Leimar *et al.*, 2012). Indeed, species belonging to the same Müllerian  
392 mimicry ring share the costs of predation but they have to be perceived very similar by predators. As a  
393 consequence, the external appearance of these species is expected to be under strong ecological selection to  
394 maintain a common signal. Accordingly, different set of characters (e.g. morphological, genetic,  
395 physiological, behavioural, etc.) will reveal their interplay with the various evolutionary forces, that is in turn  
396 affected by the allopatric/sympatric occurrence of populations of these moths with those of other co-mimics.  
397 Many *Syntomis* species are sympatric and coexist in the same or in really close biotopes, at least to the scale  
398 of bird predators' home ranges. *Syntomis quercii* and *S. marjana* have allo-parapatric distribution, but they  
399 both overlap with *S. phegea* (except in Sicily, where the latter is absent, all records hitherto being  
400 misidentifications), which is extremely abundant and has already shown to be a Batesian model also for  
401 some distantly related co-mimics, like the yellow ephialtoid form of *Zygaena ephialtes* (Sbordoni *et al.*,  
402 1979). In this context, departure of pattern from a successful aposematic signal would be strongly counter-  
403 selected during and after speciation. Strong ecological constraints would then be responsible for  
404 morphological stasis, in the face of substantial genetic divergence, thus eventually leading to the evolution of  
405 so-called cryptic diversity (Bickford *et al.*, 2007; Struck *et al.*, 2018). Interestingly, such stasis extends also  
406 to structural features of the genitalia, all fairly homogeneous across the group, which cannot evidently be  
407 modelled by predation or other external agents. This circumstance, which sharply contrasts with the striking  
408 genital diversification seen in other groups of externally almost indistinguishable moth species (e.g. the  
409 sympatric species pairs *Grammodes geometrica*-*G. occulta*, *Dysgonia algira*-*D. torrida*, *Noctua fimbriata*-*N.*  
410 *tirrenica* and *Cilix glaucata*-*C. hispanica*, to name just a few), suggests that genitalia in *Syntomis* maintain  
411 stable configurations due of phylogenetic inertia even after speciation, as they do not play any species  
412 isolation role.

413 As a matter of fact, mechanical compatibility of genitalia between different *Syntomis* species has been  
414 proved by the detection of occasional hybrids *S. phegea* x *S. ragazzii* (Sbordoni *et al.*, 1982) and  
415 heterospecific fertile matings *S. phegea* x *S. marjana* reared from the wild (Rupinpiccolo, NE Italy, A. Zilli,  
416 unpublished). Mate recognition and species integrity in *Syntomis* has therefore to rely on other systems than  
417 mechanical compatibility but, as seen above, visual stimuli are unfit candidates for that as any departure  
418 from the shared pattern would weaken efficacy of their common aposematic signalling. Bickford *et al.*  
419 (2007) recognise that cryptic diversity is particularly common in taxa not using visual mating signals. Sheer  
420 evidence that *Syntomis* species are unlikely to use visual mate recognition systems is again based on field  
421 observations of (pseudo)copulae with completely unrelated and differently patterned moths of a different  
422 family, members of the genus *Zygaena* which are part of an alternative mimicry ring based on red and black  
423 colours. Such mismatings are not uncommon during peaks of abundance of these moths, when they cluster  
424 together on flower heads and get evidently confused by congestion of pheromonal plumes all around and  
425 tactile abdominal stimuli which lead them to clasp almost anything within their reach (Lees & Zilli, in press).  
426 Breeding experiments run by us (unpublished) are fully compatible with chemically mediated interactions  
427 between sexes in *Syntomis* moths, with females typically resting in a calling posture and attracting males  
428 from distance. Furthermore, Bendib & Minet (1998) demonstrated presence of female pheromone glands in  
429 *S. phegea*, whereas Schneider *et al.* (1999) have demonstrated that males of all *Syntomis* species bear  
430 androconial organs at the base of forelegs. Thus, all evidence points to chemical communication as the main  
431 driver of mate recognition in *Syntomis* moths.

432

### 433 **Taxonomic remarks and Conclusions**

434 Our research confirms that in one of the taxonomically most controversial groups of European moths, the  
435 Euro-Anatolian *Syntomis*, additional cryptic species are involved. This is the case of a group of populations  
436 living in the Italian peninsula, Sicily and Provence that have been noted by different authors as *quercii*,  
437 *kruegeri* and *albionica*, respectively, and will have to be overall combined under the last name, i.e. *Syntomis*  
438 *quercii* Verity, 1914 (**bona sp., stat. nov.**). In fact, when first named by Ragusa (1904), the oldest name  
439 *kruegeri* was infrasubspecific and before that it was made available for nomenclature by Turati (1917),  
440 Verity's (1914) description intervened.



441 Further genetic sub-structuring has been detected in *S. quercii*, *S. ragazzii* and *S. marjana* s.s. Even if it is  
442 a common mistake to assign to populations genetically differentiated from nominotypical ones a subspecific  
443 rank, as the subspecies concept was not intended to be also evolutionary (see Zilli, 1996, and references  
444 therein), it is worth noting that at least as to *S. ragazzii*, its diversification in the southernmost part of its  
445 range (Calabrian Apennine) had already been noted with the description of two traditional subspecies  
446 (*silaensis* Obraztsov, 1966 and *asperomontana* [Stauder & Turati], 1917). Partially distinct genetic make-ups  
447 also characterise the Sicilian populations of *S. quercii*, traditionally recognized as ssp. *kruegeri*.

448 Research on the Euro-Anatolian taxa of *Syntomis* highlights how the Palaeartic species of this group  
449 provide an interesting example to study trade-offs between morphological stasis and genetic divergence in  
450 complexes involved into mimicry relationships of Müllerian type. New studies will have to be focused on  
451 understanding the genomic basis of speciation and origin of cryptic diversity within this group of moths.

452 **Figures and Tables**

453

454 **Fig. 1** – Geographical distribution of *Syntomis phegea*, *S. ragazzii* and *S. marjana sensu lato* in the Western  
455 Palearctic region and geographical locations of the 36 populations sampled. Locations are numbered as in  
456 Tab. 1. The map was drawn using the software Canvas 11 (ACD Systems of America, Inc.).

457

458 **Fig. 2** - A) Heatmap representing the pairwise matrix of population genetic distance (D Nei 78) among the  
459 Western Palearctic *Syntomis* populations analysed in this study, based on 22 allozyme loci; warmer colours  
460 indicate higher genetic identity. B) Principal coordinate analysis of the 31 analysed populations, based on the  
461 unbiased Nei genetic distance (D Nei 78), calculated on 22 allozyme loci; number in parentheses refer to the  
462 proportion of variance explained by the first two principal coordinates. The graph was drawn using the  
463 software Canvas 11 (ACD Systems of America, Inc.).

464

465 **Fig. 3** Phylogenetic relationships among the 16 mtDNA haplotypes observed. (A) Maximum likelihood tree  
466 retrieved by the analysis in IQTREE; support values at the relevant nodes are SH-aLRT support (%) and  
467 standard bootstrap support (%) based on 1000 replicates. (B) Maximum clade credibility tree recovered by  
468 the Bayesian analysis in BEAST, showing the divergence time from the most recent common ancestor  
469 (TMRCA) for the major clades; node bars (in blue) represent 95% highest posterior density (HPD) intervals  
470 for node ages; posterior probabilities for each node are also shown; MYA: million years ago. The graph was  
471 drawn using the software Canvas 11 (ACD Systems of America, Inc.).

472

473 **Tab. 1** - Geographical location of the 36 Western Palearctic *Syntomis* sampling sites, sample size, mtDNA  
474 haplotype number and type, estimates of genetic variability at allozyme loci for each population: A, mean  
475 number of alleles per locus; P(95%), percentage of polymorphic loci (the most common allele does not  
476 exceed 0.95); Ho and He, observed and expected heterozygosity, respectively (with standard deviation). N,  
477 sample size.

478 **Tab. 2** - Results from the species delimitation analyses using the ABGD, GMYC and bPTP methods on  
479 mtDNA haplotypes (details in the text). Site and haplotype codes follow Tab. 1. Different species are coded  
480 with different letters (A-F).

481 **Tab. 3** - Reduced matrix of the pairwise mean genetic distance (D Nei 1978) between (below the diagonal)  
482 and within (on the diagonal) the four genetic clusters identified by allozyme loci, and number of 100%  
483 diagnostic loci between them (above the diagonal).

484 **Fig. 1**

485

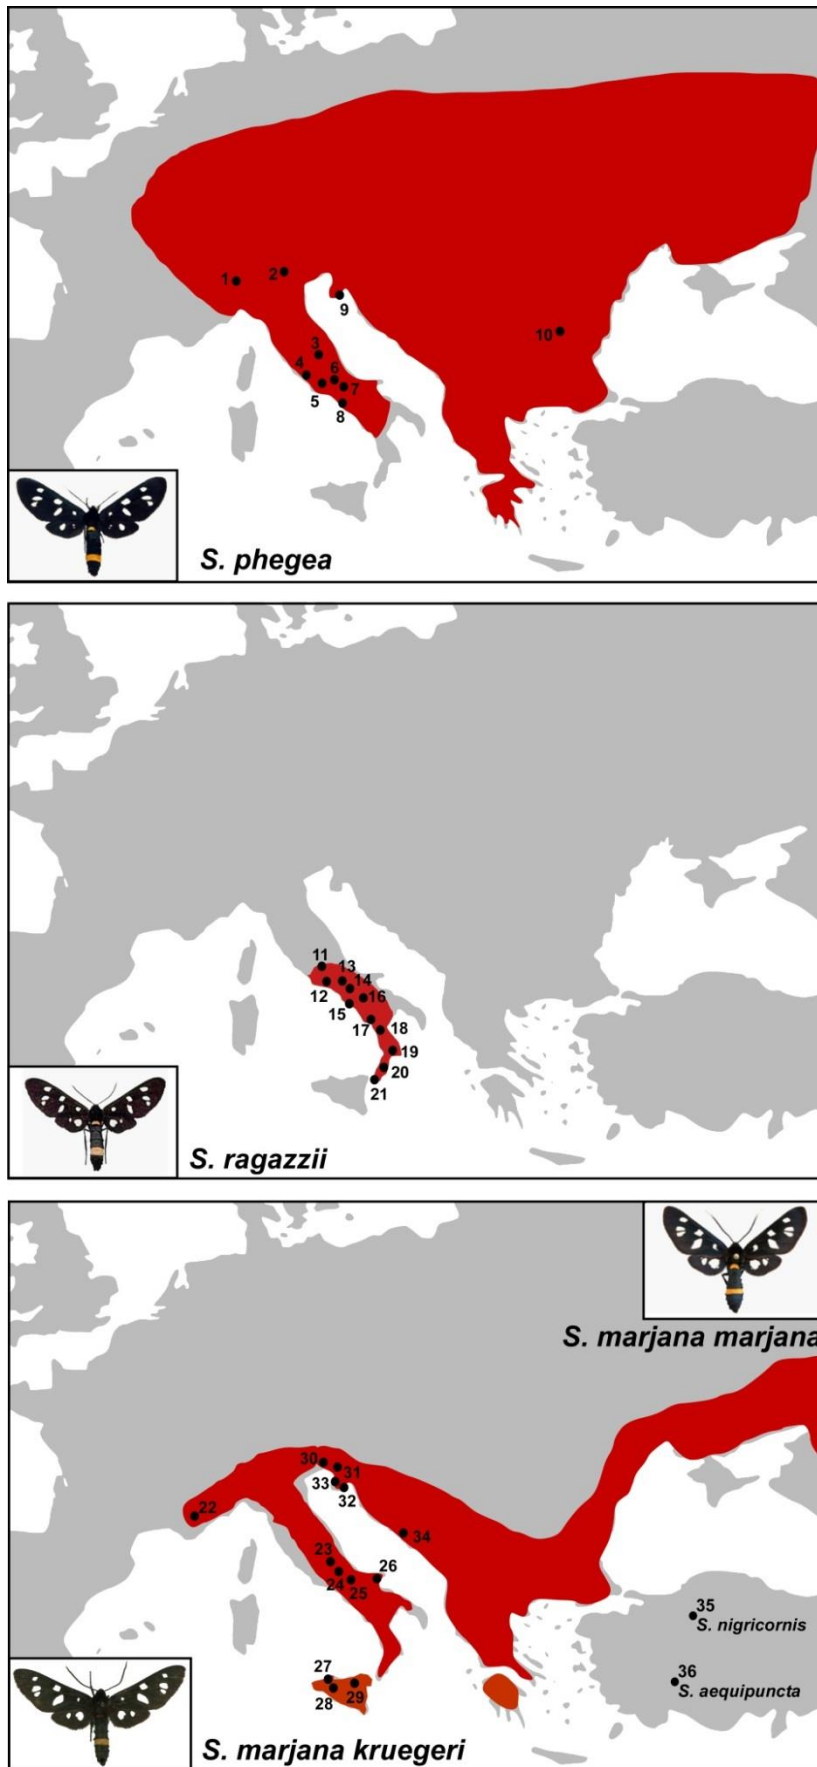

486

487

488

Fig. 2

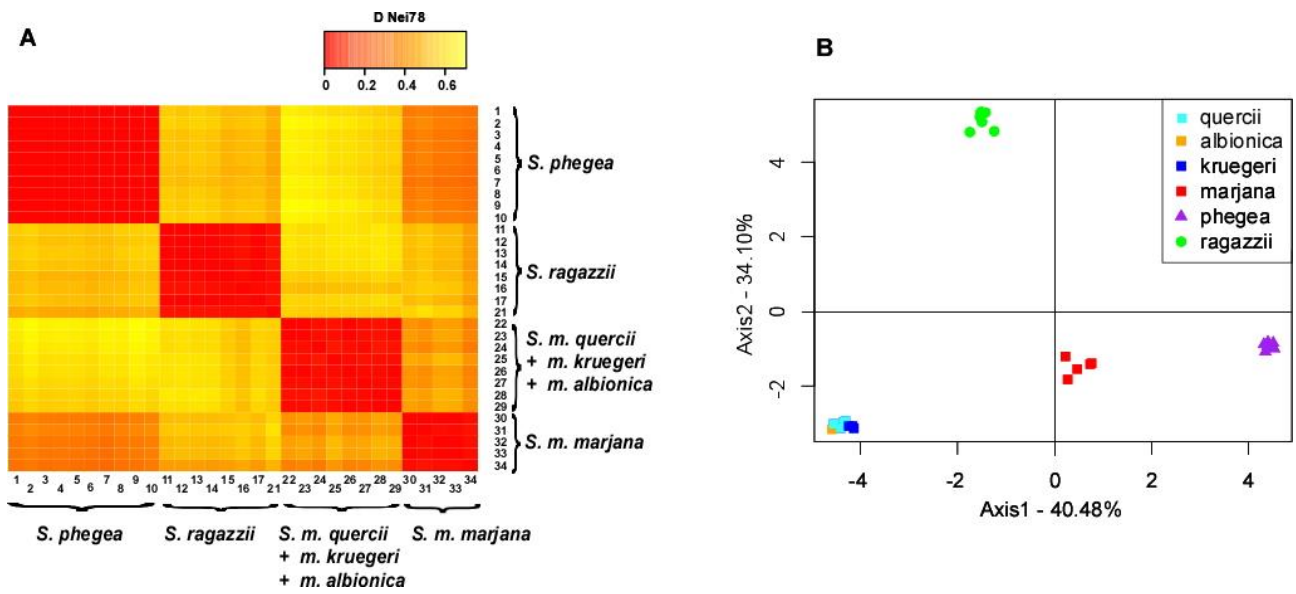

489

490

491

492

493

494

495

496

497

498

499

500

501

502

503

504

505

506

507

Fig. 3.

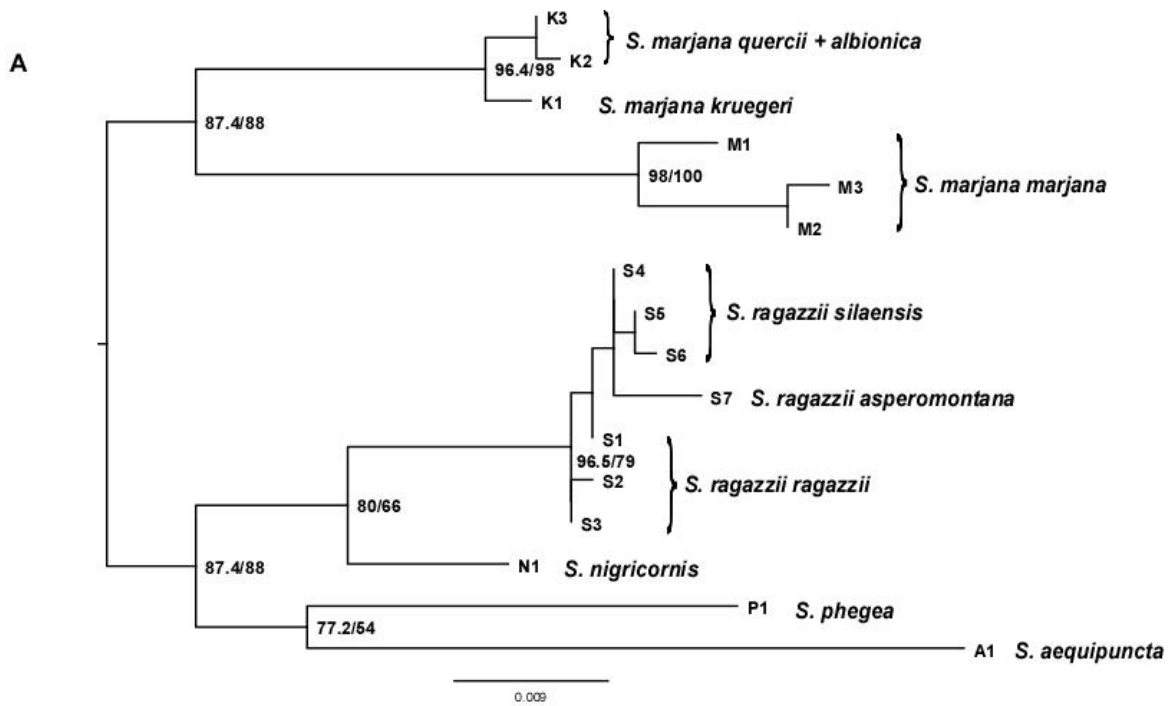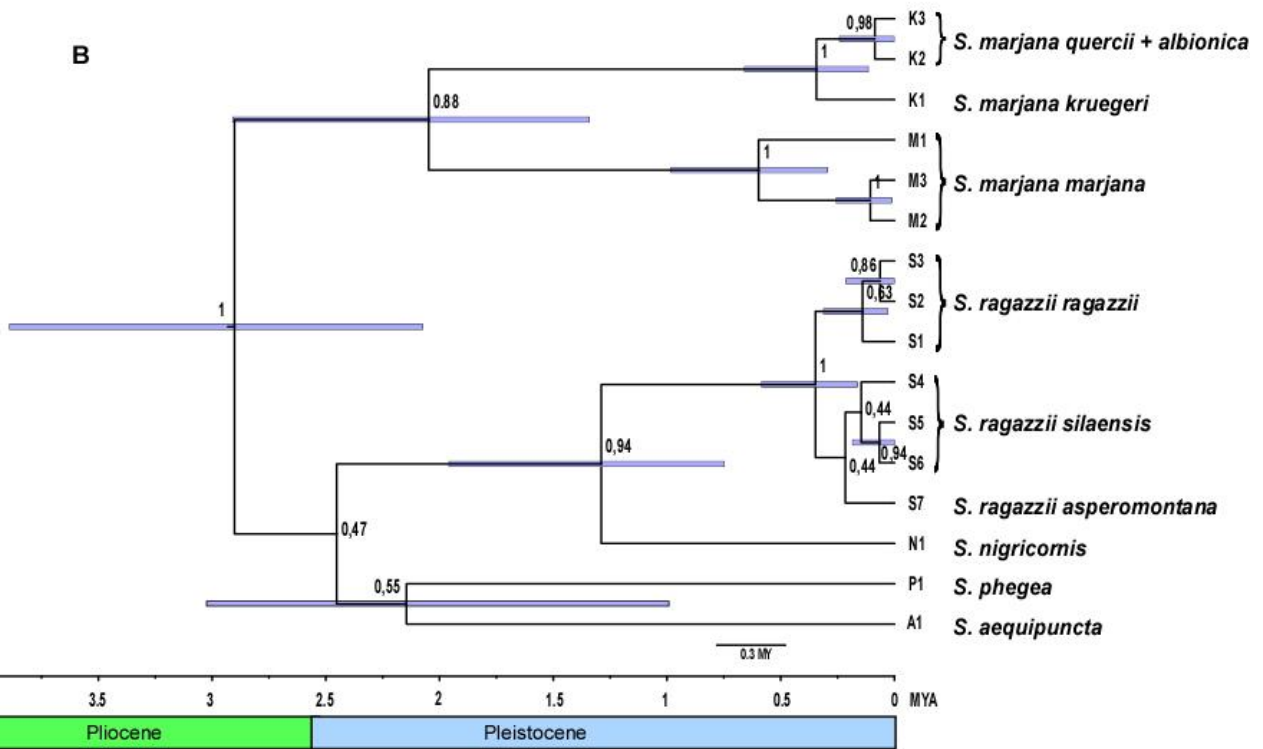

508

Table 1

| Taxon                     | Pop | Locality                                          | Lat N  | Long E | mtDNA |       | N   | mean N<br>per locus<br>(S. D.) | Allozymes    |                  |               |               |  |
|---------------------------|-----|---------------------------------------------------|--------|--------|-------|-------|-----|--------------------------------|--------------|------------------|---------------|---------------|--|
|                           |     |                                                   |        |        | N     | hapl. |     |                                | A<br>(S. D.) | P <sub>95%</sub> | Ho<br>(S. D.) | He<br>(S. D.) |  |
| <i>S. phegea</i>          |     |                                                   |        |        |       |       |     |                                |              |                  |               |               |  |
| <i>spp. ligata</i>        | 1   | Meana di Susa (Piedmont)                          | 45°07' | 7°03'  | 2     | P1    | 5   | 3.5 (0.3)                      | 1.1 (0.1)    | 9.1              | 0.045 (0.031) | 0.039 (0.027) |  |
|                           | 2   | Capriana, Val di Fiemme (Trentino)                | 46°15' | 11°19' |       |       | 59  | 18.5 (3.2)                     | 1.1 (0.1)    | 0.0              | 0.006 (0.004) | 0.006 (0.003) |  |
|                           | 3   | Montoro, Narni (Umbria)                           | 42°30' | 12°28' |       |       | 63  | 23.3 (3.8)                     | 1.4 (0.1)    | 9.1              | 0.037 (0.019) | 0.036 (0.018) |  |
|                           | 4   | Pescia Romana, Montalto di Castro (Latium)        | 42°24' | 11°30' |       |       | 55  | 25.3 (4.1)                     | 1.2 (0.1)    | 13.6             | 0.042 (0.027) | 0.035 (0.022) |  |
|                           | 5   | Monte Cavo surroundings, Colli Albani (Latium)    | 41°44' | 12°43' | 2     | P1    | 102 | 24.5 (5.6)                     | 1.3 (0.1)    | 9.1              | 0.034 (0.019) | 0.038 (0.021) |  |
|                           | 6   | Camerata Nuova, Monti Simbruini (Latium)          | 42°00' | 13°07' |       |       | 101 | 38.1 (7.2)                     | 1.3 (0.1)    | 9.1              | 0.041 (0.030) | 0.032 (0.022) |  |
|                           | 7   | Aschi Alto, Ortona dei Marsi (Abruzzo)            | 41°58' | 13°44' | 2     | P1    | 13  | 7.4 (0.6)                      | 1.2 (0.1)    | 22.7             | 0.062 (0.026) | 0.064 (0.027) |  |
|                           | 8   | Monte Faito, Monti Lattari (Campania)             | 40°39' | 14°29' |       |       | 60  | 26.9 (3.6)                     | 1.5 (0.1)    | 9.1              | 0.036 (0.014) | 0.037 (0.014) |  |
|                           | 9   | Pola, Istria (Croatia)                            | 44°54' | 13°53' |       |       | 17  | 11.0 (1.2)                     | 1.1 (0.1)    | 13.6             | 0.029 (0.017) | 0.036 (0.021) |  |
|                           | 10  | Bistricea, Sofia (Bulgaria)                       | 42°35' | 23°20' | 1     | P1    | 10  | 6.4 (0.6)                      | 1.0 (0.0)    | 4.5              | 0.010 (0.010) | 0.010 (0.010) |  |
| <i>S. ragazzii</i>        |     |                                                   |        |        |       |       |     |                                |              |                  |               |               |  |
| <i>spp. ragazzii</i>      | 11  | Montoro, Narni (Umbria)                           | 42°30' | 12°28' |       |       | 73  | 31.1 (4.6)                     | 1.2 (0.1)    | 4.5              | 0.028 (0.024) | 0.028 (0.024) |  |
|                           | 12  | Monte Tuscolo, Monte Porzio Catone (Latium)       | 41°44' | 12°43' |       |       | 80  | 36.6 (5.7)                     | 1.2 (0.1)    | 4.5              | 0.033 (0.031) | 0.031 (0.029) |  |
|                           | 13  | Camerata Nuova, Monti Simbruini (Latium)          | 42°00' | 13°07' |       |       | 80  | 27.1 (5.2)                     | 1.1 (0.1)    | 4.5              | 0.027 (0.024) | 0.025 (0.022) |  |
|                           | 14  | Colli di Montebove, Carsoli (Abruzzo)             | 42°05' | 13°09' |       |       | 24  | 14.7 (1.5)                     | 1.1 (0.1)    | 4.5              | 0.028 (0.026) | 0.027 (0.025) |  |
|                           | 15  | Monte Faito, Monti Lattari (Campania)             | 40°39' | 14°29' | 2     | S1    | 49  | 24.0 (3.3)                     | 1.5 (0.1)    | 13.6             | 0.061 (0.028) | 0.060 (0.028) |  |
|                           | 16  | Roccamandolfi, Isernia (Molise)                   | 41°29' | 14°20' |       |       | 16  | 3.8 (0.8)                      | 1.2 (0.1)    | 13.6             | 0.094 (0.055) | 0.095 (0.055) |  |
|                           | 17  | Rofrano, Cilento (Campania)                       | 40°12' | 15°25' |       |       | 37  | 23.0 (2.9)                     | 1.2 (0.1)    | 9.1              | 0.032 (0.021) | 0.033 (0.021) |  |
| <i>spp. silaensis</i>     | 18  | San Severino Lucano, Pollino Massif (Basilicata)  | 40°00' | 16°07' | 2     | S2,S3 |     |                                |              |                  |               |               |  |
|                           | 19  | Taverna, Sila Piccola (Calabria)                  | 39°04' | 16°33' | 3     | S4    |     |                                |              |                  |               |               |  |
|                           | 20  | San Pietro di Caridà, Le Serre Calabre (Calabria) | 38°29' | 16°11' | 2     | S5,S6 |     |                                |              |                  |               |               |  |
| <i>spp. asperomontana</i> | 21  | S. Stefano in Aspromonte (Calabria)               | 38°10' | 15°49' | 3     | S7    | 12  | 8.2 (0.8)                      | 1.4 (0.1)    | 18.2             | 0.083 (0.046) | 0.071 (0.037) |  |
| <i>S. marjana</i>         |     |                                                   |        |        |       |       |     |                                |              |                  |               |               |  |
| <i>spp. albionica</i>     | 22  | Saint-Christol, Vaucluse (France)                 | 44°01' | 5°31'  | 2     | K3    | 13  | 9.5 (0.8)                      | 1.1 (0.1)    | 4.5              | 0.012 (0.009) | 0.012 (0.009) |  |
| <i>spp. quercii</i>       | 23  | Vallemare, Borbona (Latium)                       | 42°28' | 13°07' |       |       | 10  | 4.7 (0.6)                      | 1.1 (0.1)    | 9.1              | 0.018 (0.013) | 0.029 (0.022) |  |
|                           | 24  | Aschi Alto, Ortona dei Marsi (Abruzzo)            | 41°58' | 13°44' | 3     | K3    | 38  | 21.3 (2.4)                     | 1.3 (0.1)    | 13.6             | 0.033 (0.018) | 0.038 (0.023) |  |
|                           | 25  | Roccamandolfi, Isernia (Molise)                   | 41°29' | 14°20' |       |       | 7   | 4.9 (0.6)                      | 1.1 (0.1)    | 9.1              | 0.039 (0.028) | 0.049 (0.035) |  |
|                           | 26  | S. Marco in Lamis, Gargano (Apulia)               | 41°41' | 15°38' | 2     | K2    | 13  | 8.0 (1.1)                      | 1.3 (0.1)    | 18.2             | 0.060 (0.028) | 0.063 (0.029) |  |
| <i>spp. kruegeri</i>      | 27  | Monte Pellegrino, Palermo (Sicily)                | 38°10' | 13°21' | 2     | K1    | 76  | 23.0 (4.1)                     | 1.3 (0.2)    | 22.7             | 0.086 (0.041) | 0.084 (0.038) |  |
|                           | 28  | Rocca Busambra, Monti Sicani (Sicily)             | 37°50' | 13°24' |       |       | 5   | 3.5 (0.4)                      | 1.2 (0.1)    | 13.6             | 0.052 (0.032) | 0.057 (0.036) |  |
|                           | 29  | Portella Femmina Morta, Nebrodi (Sicily)          | 37°55' | 14°37' |       |       | 9   | 5.6 (0.7)                      | 1.1 (0.1)    | 9.1              | 0.042 (0.029) | 0.050 (0.035) |  |
| <i>spp. marjana</i>       | 30  | Doberdò (Friuli-Venezia Giulia)                   | 45°49' | 13°31' | 2     | M2    | 26  | 14.8 (1.3)                     | 1.4 (0.1)    | 18.2             | 0.049 (0.020) | 0.056 (0.025) |  |
|                           | 31  | Sgonico, Carso triestino (Friuli-Venezia Giulia)  | 45°43' | 13°45' |       |       | 23  | 10.5 (1.7)                     | 1.2 (0.1)    | 13.6             | 0.035 (0.020) | 0.042 (0.025) |  |
|                           | 32  | Pola, Istria (Croatia)                            | 44°56' | 13°53' | 2     | M3    | 23  | 13.6 (1.4)                     | 1.2 (0.1)    | 9.1              | 0.021 (0.013) | 0.023 (0.014) |  |
|                           | 33  | Umago, Istria (Croatia)                           | 45°25' | 13°36' |       |       | 8   | 4.1 (0.6)                      | 1.2 (0.1)    | 13.6             | 0.045 (0.025) | 0.056 (0.033) |  |
|                           | 34  | Stari Grad (Croatia)                              | 43°11' | 16°37' | 2     | M1    | 36  | 16.8 (2.2)                     | 1.4 (0.1)    | 18.2             | 0.097 (0.044) | 0.083 (0.038) |  |
| <i>S. nigricornis</i>     | 35  | Ankara (Turkey)                                   | 39°49' | 32°34' | 2     | N1    |     |                                |              |                  |               |               |  |
| <i>S. aequipuncta</i>     | 36  | Eğirdir (Turkey)                                  | 37°51' | 30°49' | 2     | A1    |     |                                |              |                  |               |               |  |

**Table 2**

| Taxon                           | Site | haplotypes | ABGD              |                     | GMYC             |                    | PTP |
|---------------------------------|------|------------|-------------------|---------------------|------------------|--------------------|-----|
|                                 |      |            | primary partition | secondary partition | single threshold | multiple threshold |     |
| <i>S. phegea ligata</i>         | 1    | P1         | A                 | A                   | A                | A                  | A   |
| <i>S. ragazzi ragazzii</i>      | 15   | S1         | B                 | B                   | B                | B                  | B   |
| <i>S. ragazzi ragazzii</i>      | 18   | S2, S3     | B                 | B                   | B                | B                  | B   |
| <i>S. ragazzi silaensis</i>     | 19   | S4         | B                 | B                   | B                | B                  | B   |
| <i>S. ragazzi silaensis</i>     | 20   | S5, S6     | B                 | B                   | B                | B                  | B   |
| <i>S. ragazzi asperomontana</i> | 21   | S7         | B                 | B                   | B                | B                  | B   |
| <i>S. majana albionica</i>      | 22   | K3         | C                 | C1                  | C                | C1                 | C1* |
| <i>S. majana quercii</i>        | 24   | K3         | C                 | C1                  | C                | C1                 | C1* |
| <i>S. majana quercii</i>        | 26   | K2         | C                 | C1                  | C                | C1                 | C1* |
| <i>S. majana kruegeri</i>       | 27   | K1         | C                 | C2                  | C                | C2                 | C2* |
| <i>S. majana marjana</i>        | 30   | M2         | D                 | D1                  | D                | D1                 | D1  |
| <i>S. majana marjana</i>        | 32   | M3         | D                 | D1                  | D                | D1                 | D1  |
| <i>S. majana marjana</i>        | 34   | M1         | D                 | D2                  | D                | D2                 | D2  |
| <i>S. nigricornis</i>           | 35   | N1         | E                 | E                   | E                | E                  | E   |
| <i>S. aequipuncta</i>           | 36   | A1         | F                 | F                   | F                | F                  | F   |

\* not supported

**Table 3**

|                                                                       | <i>S. phegea</i>       | <i>S. ragazzii</i>     | <i>S. m. kruegeri</i> +<br><i>S. m. quercii</i> +<br><i>S. m. albionica</i> | <i>S. m. marjana</i>   |
|-----------------------------------------------------------------------|------------------------|------------------------|-----------------------------------------------------------------------------|------------------------|
| <i>S. phegea ligata</i>                                               | 0.002<br>(0.000-0.008) | 7                      | 9                                                                           | 4                      |
| <i>S. ragazzii ragazzii</i> + <i>S. r. asperomontana</i>              | 0.536<br>(0.455-0.591) | 0.013<br>(0.000-0.034) | 7                                                                           | 5                      |
| <i>S. m. kruegeri</i> + <i>S. m. quercii</i> + <i>S. m. albionica</i> | 0.629<br>(0.557-0.706) | 0.597<br>(0.516-0.647) | 0.017<br>(0.002-0.048)                                                      | 5                      |
| <i>S. m. marjana</i>                                                  | 0.338<br>(0.290-0.392) | 0.523<br>(0.429-0.629) | 0.432<br>(0.345-0.518)                                                      | 0.013<br>(0.003-0.031) |

## **Supporting information**

Additional supporting information may be found online in the Supporting Information section at the end of the article.

**Supplementary table 1.** Allele frequencies at the 18 polymorphic allozyme loci studied.

**Supplementary table 2.** Matrix of genetic distance (Nei, 1978) among the studied population samples.

## **Acknowledgments**

We would like to thank Mauro Zampiglia for his help on fieldwork. AC also thanks J. Rota for her helpful suggestions. The authors declare that there are no conflicts of interest.



## References

- Ayala, F. J., & Powell, J. R. (1972). Allozymes as diagnostic characters of sibling species of *Drosophila*. *Proceedings of the National Academy of Sciences*, **69**, 1094-1096.
- Ayala F.J., Powell J.R., Tracey M.L., Mourão C.A. & Pérez-Salas, S. (1972). Enzyme variability in the *Drosophila willistoni* group. IV. Genic variation in natural populations of *Drosophila willistoni*. *Genetics*, **70**, 113–139.
- Abrantes, F., Voelker, A., Sierro Sanchez, F., Naughton, F., Rodrigues, T., Cacho, I., Ariztegui, D., Brayshaw, D., Sicre, M-A. & Batista, L. (2010) Paleoclimate variability in the Mediterranean region. *The Climate of the Mediterranean Region* (ed. by Lionello, P.) pp. 1–86, Elsevier, London.
- Bálint, M., Domisch, S., Engelhardt, C.H.M., Haase, P., Lehrian, S., Sauer, J., Theissinger, K., Pauls, S.U. & Nowak, C. (2011) Cryptic biodiversity loss linked to global climate change. *Nature Climate Change*, **1**, 313–318.
- Beheregaray, L.B. & Caccone, A. (2007) Cryptic biodiversity in a changing world. *Journal of Biology*, **6**, 9.
- Bendib, A. & Minet, J. (1998) Female pheromone glands in Arctiidae (Lepidoptera). Evolution and phylogenetic significance. *Comptes Rendus de l'Académie des Sciences*, (III) (Sciences de la Vie), **321**, 1007–1014.
- Bertaccini, E., Fiumi, G. & Provera, P. (1997) *Bombici e Sfingi d'Italia (Lepidoptera: Heterocera)*. Volume 2. Natura – Giuliano Russo Editore, Bologna.
- Bickford, D., Lohman, D.J., Sodhi, N.S., Ng, P.K., Meier, R., Winker, K., Ingram, K.K. & Das, I. (2007) Cryptic species as a window on diversity and conservation. *Trends in Ecology & Evolution*, **22**, 148–155.
- Bonfiglio, L., Mangano, G., Marra, A.C., Masini, F., Pavia, M. & Petruso, D. (2002) Pleistocene Calabrian and Sicilian bioprovinces. *Geobios*, **35**, 29–39.
- Boppré, M., Vane-Wright, R.I. & Wickler, W. (2017) A hypothesis to explain accuracy of wasp resemblances. *Ecology and Evolution*, **7**, 73–81.
- Brower, A.V. (1994) Rapid morphological radiation and convergence among races of the butterfly *Heliconius erato* inferred from patterns of mitochondrial DNA evolution. *Proceedings of the National Academy of Sciences*, **91**, 6491–6495.
- Bullini, L. & Sbordoni, V. (1980) Electrophoretic studies of gene-enzyme systems: microevolutionary processes and phylogenetic inference. *Bolletino di Zoologia*, **47**(suppl.), 95–112.
- Bullini, L., Sbordoni, V. & Ragazzini, P. (1969) Mimetismo mülleriano in popolazioni italiane di *Zygaena ephialtes* (L.) (Lepidoptera, Zygaenidae). *Archivio Zoologico Italiano*, **54**, 181–214.
- Bullini, L., Cianchi, R., Stefani, C. & Sbordoni, V. (1981) Biochemical taxonomy of the *Amata phegea* complex (Ctenuchidae, Syntominae). *Nota lepidopterologica* **4**, 125–127.
- Canestrelli, D. & Nascetti, G. (2008) Phylogeography of the pool frog *Rana (Pelophylax) lessonae* in the Italian peninsula and Sicily: multiple refugia, glacial expansions and nuclear–mitochondrial discordance. *Journal of Biogeography*, **35**, 1923–1936.

- Canestrelli, D., Aloise, G., Cecchetti, S. & Nascetti, G. (2010) Birth of a hotspot of intraspecific genetic diversity: notes from the underground. *Molecular Ecology*, **19**, 5432–5451.
- Carstens, B.C., Pelletier, T.A., Reid, N.M. & Satler, J.D. (2013) How to fail at species delimitation. *Molecular ecology*, **22**, 4369–4383.
- Chiocchio, A., Colangelo, P., Aloise, G., Amori, G., Bertolino, S., Bisconti, R., Castiglia, R. & Canestrelli, D. (2019) Population genetic structure of the bank vole *Myodes glareolus* within its glacial refugium in peninsular Italy. *Journal of Zoological Systematics and Evolutionary Research*, (early view).
- Cianchi, R., Stefani, C., Sbordoni, V. & Bullini, L. (1980) Ricerche elettroforetiche sulle specie italiane del complesso *Amata phegea* (Lepidoptera, Ctenuchidae): aspetti genetici, tassonomici ed evolutivi. *Atti XII Congresso nazionale italiano di Entomologia*, **2**, 239–242.
- Cvetkovic, V., Prelević, D. & Schmid, S. (2016) *Geology of South-Eastern Europe*. In: *Mineral and thermal waters of Southeastern Europe* (pp. 1–29). Springer, Cham.
- Darriba, D., Taboada, G.L., Doallo, R. & Posada, D. (2012) jModelTest 2: more models, new heuristics and parallel computing. *Nature methods*, **9**, 772.
- Doyle, J.J. & Doyle, J.L. (1990) Isolation of plant DNA from fresh tissue. *Focus*, **12**, 39–40.
- DMEER (2017). *Digital Map of European Ecological Regions*. Update 01 Nov 2017. European Environment Agency. <http://www.eea.europa.eu/data-and-maps/data/digital-map-of-european-ecological-regions>
- Drummond, A.J. & Rambaut, A. (2007) BEAST: Bayesian evolutionary analysis by sampling trees. *BMC evolutionary biology*, **7**, 214.
- Drummond, A.J., Suchard, M.A., Xie, D. & Rambaut, A. (2012) Bayesian phylogenetics with BEAUti and the BEAST 1.7. *Molecular biology and evolution*, **29**, 1969–1973.
- Dufay, C. (1970) *Amata albionica* Dufay, bona species et son ethologie (Lep. Ctenuchidae). *Entomops*, **17**, 31–40.
- Ezard, T., Fujisawa, T. & Barraclough, T.G. (2015) SPLITS: SPecies' Limits by Threshold Statistics. R package version 1.0-18/r45.
- Fauquette, S., Suc, J.P., Guiot, J., Diniz, F., Feddi, N., Zheng, Z., Bessais, E. & Drivaliari, A. (1999) Climate and biomes in the West Mediterranean area during the Pliocene. *Palaeogeography, Palaeoclimatology, Palaeoecology*, **152**, 15–36.
- Fennessy, J., Bidon, T., Reuss, F., Kumar, V., Elkan, P., Nilsson, M.A., Vamberger, M., Fritz, U. & Janke, A. (2016) Multi-locus analyses reveal four giraffe species instead of one. *Current Biology*, **26**, 2543–2549.
- Fibiger, M., Laszló, G.M., Ronkay, G., Ronkay, L., Speidel, W., Varga, Z., Wahlberg, N., Witt, T.J., Yela, J.L., Zahiri, R. & Zilli, A. (2011) Lymantriinae and Arctiinae, including phylogeny and check list of the quadrifid Noctuoidea of Europe. *Noctuidae Europaeae 13*. Entomological Press, Sorø.
- Freina, J.J. de (2008) Über die Biologie, Morphologie, Phänologie und Taxonomie von *Amata (Syntomis) kruegeri* (Ragusa, 1904) (Lepidoptera: Arctiidae, Syntomini). *Nachrichten des Entomologischen Vereins Apollo*, (N.F.), **28**, 97–107.

- Freina, J.J., de & Witt, T.J. (1987) *Die Bombyces und Sphinges der Westpalaearktis*. Forschung & Wissenschaft, München.
- Fujita, M.K., Leaché, A.D., Burbrink, F.T., McGuire, J.A. & Moritz, C. (2012) Coalescent-based species delimitation in an integrative taxonomy. *Trends in ecology & evolution*, **27**, 480–488.
- Giraldo, N., Salazar, C., Jiggins, C.D., Bermingham, E. & Linares, M. (2008) Two sisters in the same dress: *Heliconius* cryptic species. *BMC Evolutionary Biology*, **8**, 324.
- Gómez, A. & Lunt, D.H. (2007) Refugia within refugia: patterns of phylogeographic concordance in the Iberian Peninsula. *Phylogeography of southern European refugia* (ed. by Weiss, S. & Ferand, N.), pp. 155–188. Springer, Netherlands.
- Gustafsson, A.L.S., Skrede, I., Rowe, H.C., Gussarova, G., Borgen, L., Rieseberg, L.H., Brochmann, C. & Parisod, C. (2014) Genetics of cryptic speciation within an arctic mustard, *Draba nivalis*. *PloS one*, **9**(4), e93834.
- Harris, H. & Hopkinson, D.A. (1976) *Handbook of enzyme electrophoresis in human genetics*. North-Holland.
- Hebert, P.D.N., Cywinska, A., Ball, S.L. & DeWaard, J.R. (2003) Biological identifications through DNA barcodes. *Proceedings of the Royal Society of London, (B) (Biological Sciences)*, **270**, 313–321.
- Hewitt, G.M. (1996) Some genetic consequences of ice ages, and their role in divergence and speciation. — *Biological Journal of the Linnean Society*, **58**, 247–276.
- Hewitt, G.M. (2011) Mediterranean peninsulas: the evolution of hotspots. *Biodiversity hotspots* (ed. by Zachos, F. E., & Habel, J. C.), pp. 123–147. Springer, Berlin, Heidelberg.
- Hewitt, G.M. (1999) Postglacial re-colonization of European biota. *Biological Journal of the Linnean Society*, **68**, 87–112.
- Hinojosa, J.C., Monasterio, Y., Escobés, R., Dincă, V. & Vila, R. (2018) *Erebia epiphron* and *Erebia orientalis*: sibling butterfly species with contrasting histories. *Biological Journal of the Linnean Society*, **126**, 338–348.
- Igniatjev, N.N. & Zolotuhin, V.V. (2005) A review of syntomids (Lepidoptera: Syntomidae) of Russia and adjacent territories. Part 1. Genus *Syntomis* Ochsenheimer 1808. *Eversmannia*, **3/4**: 28–54.
- Jiggins, C.D. (2017) *The ecology & evolution of Heliconius butterflies*. Oxford, University Press.
- Knowlton, N. (1993) Sibling species in the sea. *Annual review of ecology and systematics*, **24**, 189–216.
- Larkin, M.A., Blackshields, G., Brown, N.P., Chenna, R., McGettigan, P.A., McWilliam, H., Valentin, F., Wallace, I.M., Wilm, A., Lopez, R., Thompson, J.D., Gibson, T.J. & Higgins, D.G. (2007) Clustal W and Clustal X version 2.0. *Bioinformatics*, **23**, 2947–2948.
- Lawrence, J.P., Rojas, B., Fouquet, A., Mappes, J., Blanchette, A., Saporito, R.A., Bosque, R.J., Courtois, E.A. & Noonan, B.P. (2019) Weak warning signals can persist in the absence of gene flow. *Proceedings of the National Academy of Sciences*, **116**, 19037–19045.
- Lees, D.C. & Zilli, A. (2019) *Moths: Their biology, diversity and evolution*. Natural History Museum, London.

- Leimar, O., Tullberg, B.S. & Mallet, J. (2012) Mimicry, saltational evolution, and the crossing of fitness valleys. *The Adaptive Landscape in Evolutionary Biology* (ed. by Svensson, E., & Calsbeek, R.), pp. 259–270. Oxford University Press, Oxford.
- Librado, P., & Rozas, J. (2009) DnaSP v5: a software for comprehensive analysis of DNA polymorphism data. *Bioinformatics*, **25**, 1451–1452.
- Malatesta, A. (1985). *Geologia e paleobiologia dell'era glaciale*. NIS, Roma, 282 pp.
- Mayr, E., (1963) *Animal species and evolution*. Belknap Press of Harvard University Press, Cambridge Mass.
- Nei, M. (1978) Estimation of average heterozygosity and genetic distance from a small number of individuals. *Genetics*, **89**, 583–590.
- Nguyen, L.T., Schmidt, H.A., von Haeseler, A. & Minh, B.Q. (2014) IQ-TREE: a fast and effective stochastic algorithm for estimating maximum-likelihood phylogenies. *Molecular biology and evolution*, **32**, 268–274.
- Obraztsov, N.S. (1966) Die Palaearktischen *Amata* – Arten (Lepidoptera, Ctenuchidae). *Veröffentlichungen der Zoologischen Staatssammlung München*, **10**, 1–383.
- Papadopoulou, A., Anastasiou, I. & Vogler, A.P. (2010) Revisiting the insect mitochondrial molecular clock: the mid-Aegean trench calibration. *Molecular Biology and Evolution*, **27**, 1659–1672.
- Pardo-Diaz, C., Salazar, C., Baxter, S.W., Merot, C., Figueiredo-Ready, W., Joron, M., McMillan, W.O. & Jiggins, C.D. (2012) Adaptive introgression across species boundaries in *Heliconius* butterflies. *PLoS Genetics*, **8**, e1002752.
- Peakall, R.O.D. & Smouse, P.E. (2006) GENALEX 6: genetic analysis in Excel. Population genetic software for teaching and research. *Molecular ecology notes*, **6**, 288–295.
- Pérez-Ponce de León, G. & Poulin, R. (2016) Taxonomic distribution of cryptic diversity among metazoans: not so homogeneous after all. *Biology letters*, **12**, 20160371.
- Pfennig, D.W. (2012) Mimicry: ecology, evolution, and development. *Current Zoology*, **58**, 603–606.
- Pfennig, D.W. & Mullen, S.P. (2010) Mimics without models: Causes and consequences of allopatry in Batesian mimicry. *Proceedings of the Royal Society of London, (B)*, **277**, 2577–2585.
- Pfenninger, M. & Schwenk, K. (2007) Cryptic animal species are homogeneously distributed among taxa and biogeographical regions. *BMC evolutionary biology*, **7**, 121.
- Przybyłowicz, Ł., Lees, D.C., Zenker, M.M., & Wahlberg, N. (2019) Molecular systematics of the arctiine tribe Syntomini (Lepidoptera, Erebidae). *Systematic Entomology*, **44**, 624–637.
- Pons, J., Barraclough, T.G., Gomez-Zurita, J., Cardoso, A., Duran, D.P., Hazell, S., Kamoun, S., Sumlin, W.D. & Vogler, A.P. (2006) Sequence-based species delimitation for the DNA taxonomy of undescribed insects. *Systematic Biology*, **55**, 595–609.
- Puillandre, N., Lambert, A., Brouillet, S. & Achaz, G. (2012a) ABGD, Automatic Barcode Gap Discovery for primary species delimitation. *Molecular ecology*, **21**, 1864–1877.

- Puillandre, N., Modica, M.V., Zhang, Y., Sirovich, L., Boisselier, M.C., Cruaud, C., Holford, M. & Samadi, S. (2012b) Large-scale species delimitation method for hyperdiverse groups. *Molecular ecology*, **21**, 2671–2691.
- Racheli, T. & Zilli, A. (1985) Modelli di distribuzione dei Lepidotteri nell'Italia meridionale. *Biogeographia*, **11**, 165–194.
- Ragusa, E. (1904) Note Lepidotterologiche. *Il Naturalista Siciliano*, **17**, 18–20.
- Reidenbach, K.R., Neafsey, D.E., Costantini, C., Sagnon, N.F., Simard, F., Ragland, G.J., Egan, S.P., Feder, J.L., Muskavitch, M.A.T. & Besansky, N.J. (2012) Patterns of genomic differentiation between ecologically differentiated M and S forms of *Anopheles gambiae* in West and Central Africa. *Genome biology and evolution*, **4**, 1202–1212.
- Robuchon, M., Faith, D.P., Julliard, R., Leroy, B., Pellens, R., Robert, A., Thevenin, C., Veron, S. & Pavoine, S. (2019) Species splitting increases estimates of evolutionary history at risk. *Biological Conservation*, **235**, 27–35.
- Roca, A.L., Georgiadis, N., Pecon-Slattery, J. & O'Brien, S.J. (2001) Genetic evidence for two species of elephant in Africa. *Science*, **293**, 1473–1477.
- Rögl, F. (1999) Mediterranean and Paratethys. Facts and hypotheses of an Oligocene to Miocene paleogeography (short overview). *Geologica carpathica*, **50**, 339–349.
- Ruxton, G.D., Sherratt, T.N. & Speed, M.P. (2004) *Avoiding attack: the evolutionary ecology of crypsis, warning signals and mimicry*. Oxford University Press, Oxford.
- Sbordoni, V., Bullini, L., Scarpelli, G., Forestiero, S. & Rampini, M. (1979) Mimicry in the burnet moth *Zygaena ephialthes*: population studies and evidence of a Batesian-Müllerian situation. *Ecological Entomology*, **4**, 83–93.
- Sbordoni, V., Bullini, L., Bianco, P., Cianchi, R., De Matthaëis, E. & Forestiero, S. (1982) Evolutionary studies on ctenuchid moths of the genus *Amata*: 2. Temporal isolation and natural hybridization in sympatric populations of *Amata phegea* and *A. ragazzii*. *Journal of the Lepidopterists' Society*, **36**, 185–191.
- Scalercio, S., Cini, A., Menchetti, M., Vodă, R., Bonelli, S., Bordoni, A., Casacci, L., Dinča, V., Balletto, E., Vila, R. & Dapporto, L. (2019) How long are 3 kilometers for a butterfly? Ecological constraints and functional traits explain high genetic differentiation between Sicily and the Italian Peninsula. XXI European Congress of Lepidopterology, University of Molise, Campobasso (Italy), Book of abstracts, 76–77.
- Schenk, J.J. (2016) Consequences of secondary calibrations on divergence time estimates. *PLoS One*, **11**(1), e0148228.
- Schmitt, T. (2007) Molecular biogeography of Europe: Pleistocene cycles and postglacial trends. *Frontiers in zoology*, **4**, 11.

- Schneider, D., Legal, L., Dier, I. W. & Wink, M. (1999) Androconial hairbrushes of the *Syntomis* (*Amata*) *phegea* (L.) group (Lepidoptera, Ctenuchinae): a synapomorphic character supported by sequence data of the mitochondrial 16S rRNA gene. *Zeitschrift für Naturforschung, C*, **54**, 1119–1139.
- Schwarzfeld, M.D. & Sperling, F.A. (2015) Comparison of five methods for delimitating species in *Ophion* Fabricius, a diverse genus of parasitoid wasps (Hymenoptera, Ichneumonidae). *Molecular phylogenetics and evolution*, **93**, 234–248.
- Selander, R.K. (1971) Biochemical polymorphism and systematics in the genus *Peromyscus*. 1. Variation in the old field mouse (*Peromyscus polionotus*). *University of Texas Publications*, **7103**, 49–90.
- Simon, C., Frati, F., Beckenbach, A., Crespi, B., Liu, H. & Flook, P. (1994) Evolution, weighting, and phylogenetic utility of mitochondrial gene sequences and a compilation of conserved polymerase chain reaction primers. *Annals of the entomological Society of America*, **87**, 651–701.
- Stauder, H. (1913) *Syntomis phegea* L. aus dem österreichischen Litorale und Mitteldalmatien. *Zeitschrift für wissenschaftliche Insektenbiologie*, **9**, 236–239.
- Stauder, H. (1928-1929). Genus *Syntomis* O. im zirkum-adriatisch-tyrrhenisch-ligurischen Gebiete. *Lepidopterologische Rundschau*, **2**, (15) 149–154, (16/17) 160–171, (18) 173–176, (19) 187–190, (20) 200–201, (21) 207–210, (22) 215–218, (23) 227–230, (24) 239–242; *Entomologische Anzeiger*, **9**, 10–12.
- Struck, T.H., Feder, J.L., Bendiksbj, M., Birkeland, S., Cerca, J., Gusarov, V.I., Kistenich, S., Larsson, K-H., Liow, L.H., Nowak, M.D., Stedje, B., Bachmann, L. & Dimitrov, D. (2018) Finding evolutionary processes hidden in cryptic species. *Trends in Ecology & Evolution*, **33**, 153–163.
- Suc, J.P. & Popescu, S.M. (2005) Pollen records and climatic cycles in the North Mediterranean region since 2.7 Ma. *Geological Society, London, Special Publications*, **247**, 147–158.
- Swofford, D.L. & Selander, R.B. (1999) BIOSYS-2: A Computer Program for the Analysis of Allelic Variation in Population Genetics and Biochemical Systematics (Release 2.0). University of Illinois, Urbana-Champaign.
- Taberlet, P., Fumagalli, L., Wust-Saucy, A. & Cosson, J. (1998) Comparative phylogeography and postglacial colonization routes in Europe. *Molecular Ecology*, **8**, 1923–1934.
- Tamura, K., Stecher, G., Peterson, D., Filipski, A. & Kumar, S. (2013). MEGA6: molecular evolutionary genetics analysis version 6.0. *Molecular biology and evolution*, **30**, 2725–2729.
- Turati, E. (1917) Revisione delle *Syntomis* Palearctiche a doppio cingolo giallo, e saggio di una classificazione delle varie forme e specie. *Atti della Società italiana di Scienze naturali*, **56**, 179–232, pls 2–8.
- Verity, R. (1914) Contributo allo studio della variazione nei Lepidotteri tratto principalmente da materiale di Toscana, delle Marche e di Calabria. *Bollettino della Società Entomologica Italiana*, **45**, 203–238, 1 pl.
- Wiens, J.J. (2007) Species delimitation: new approaches for discovering diversity. *Systematic Biology*, **56**, 875–878.
- Wiens, J.J. & Servedio, M.R. (2000) Species delimitation in systematics: inferring diagnostic differences between species. *Proceedings of the Royal Society of London, (B)*, **267**, 631–636.

Zhang, J., Kapli, P. & Stamatakis, A. (2013) A general species delimitation method with applications to phylogenetic placements. *Bioinformatics*, **29**, 2869–2876.

Zilli, A. (1996) Colour polymorphism of *Callimorpha dominula* (Linnaeus, 1758) in Italy, and the problem of polytopic subspecies (Lepidoptera, Arctiidae, Callimorphinae). *Mitteilungen der Münchner Entomologischen Gesellschaft*, **86**, 79–98.

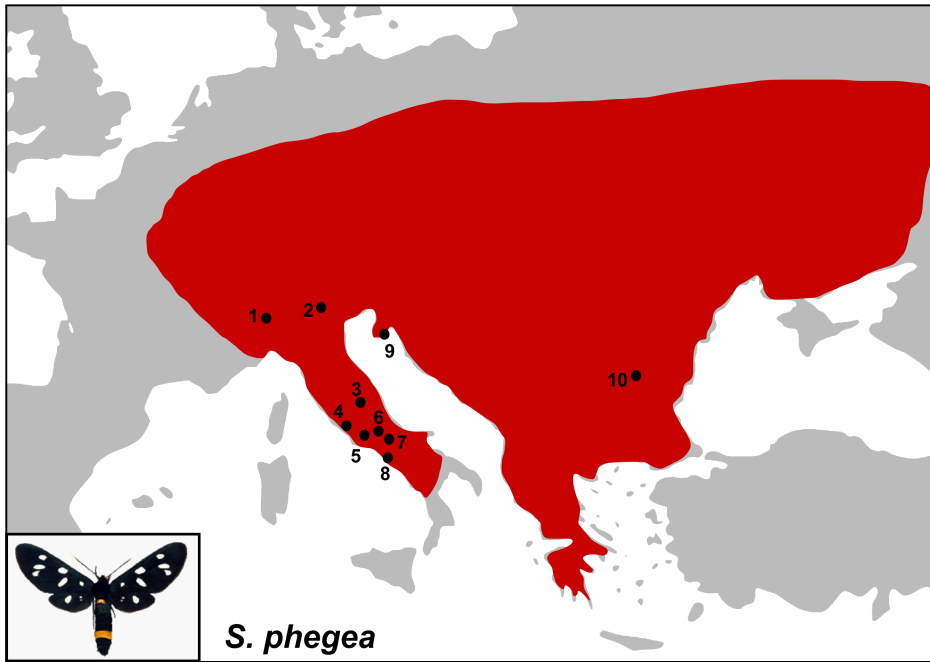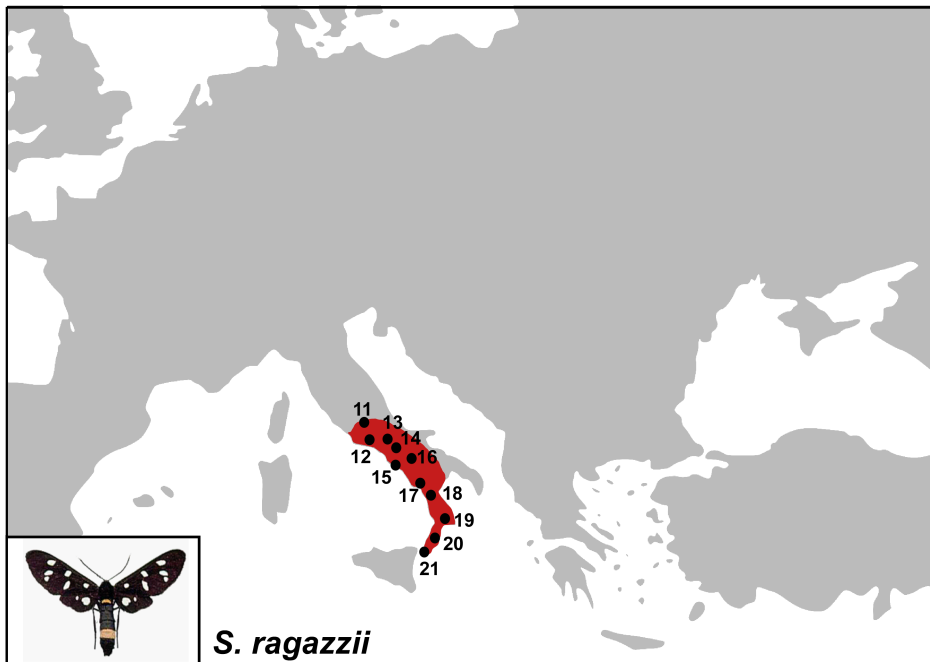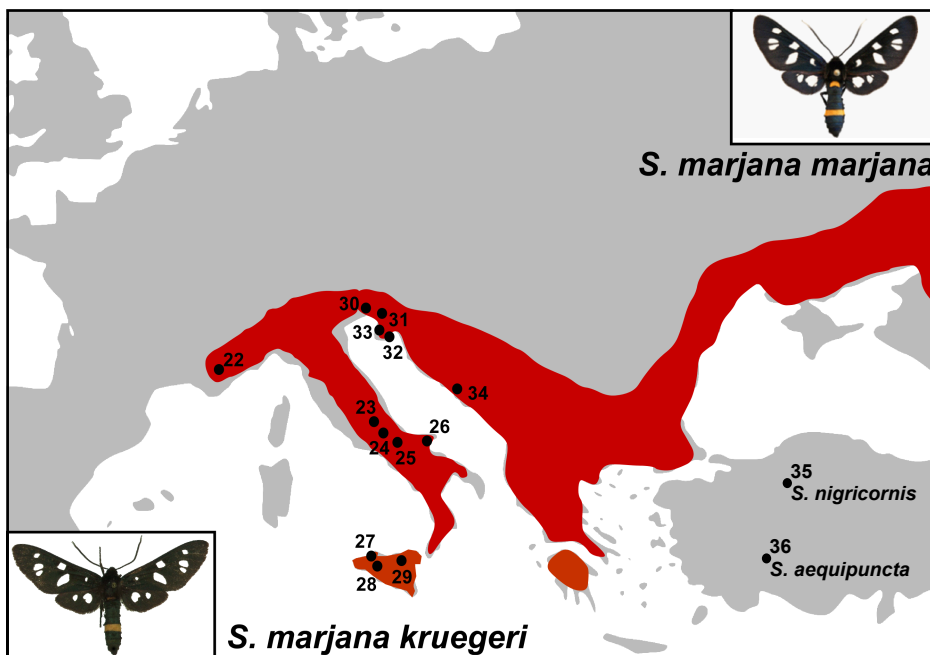



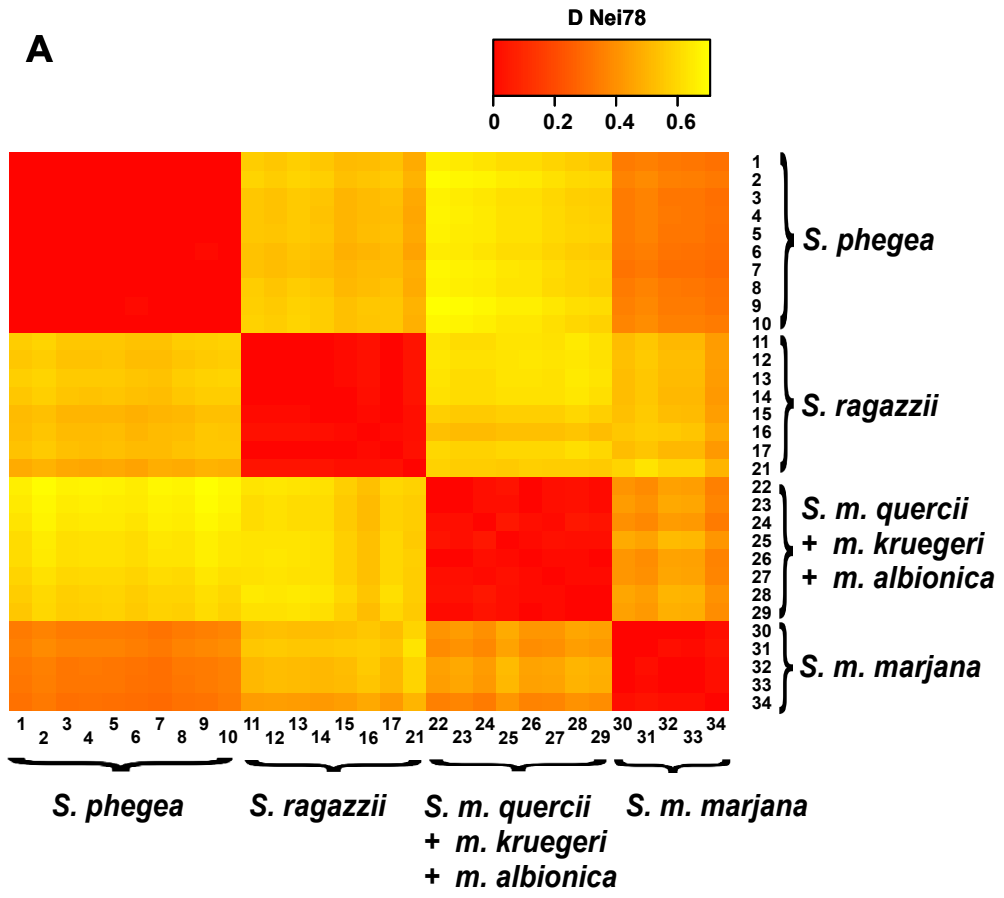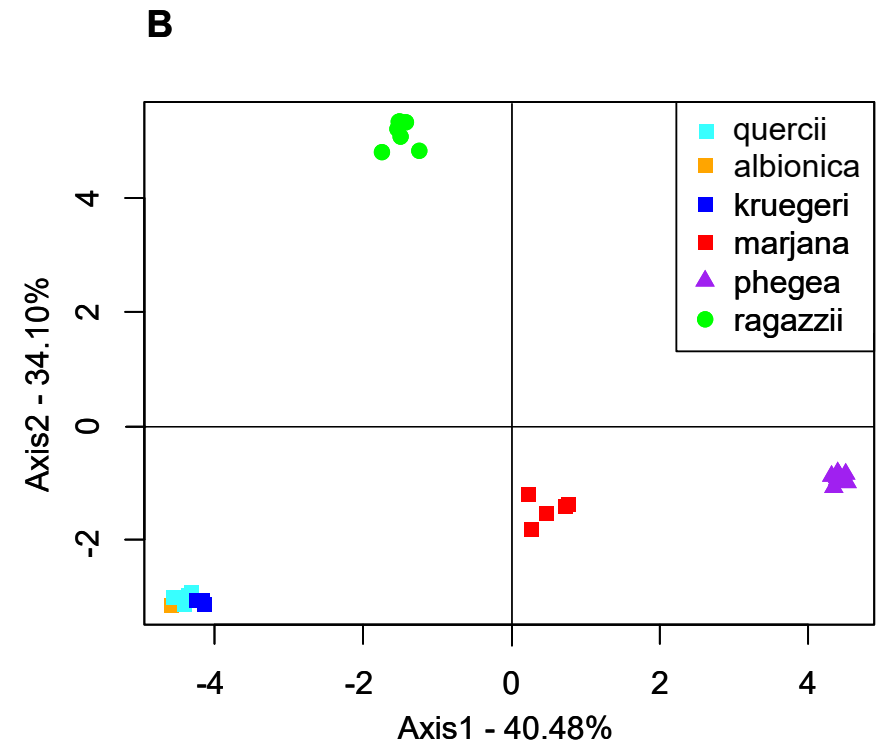

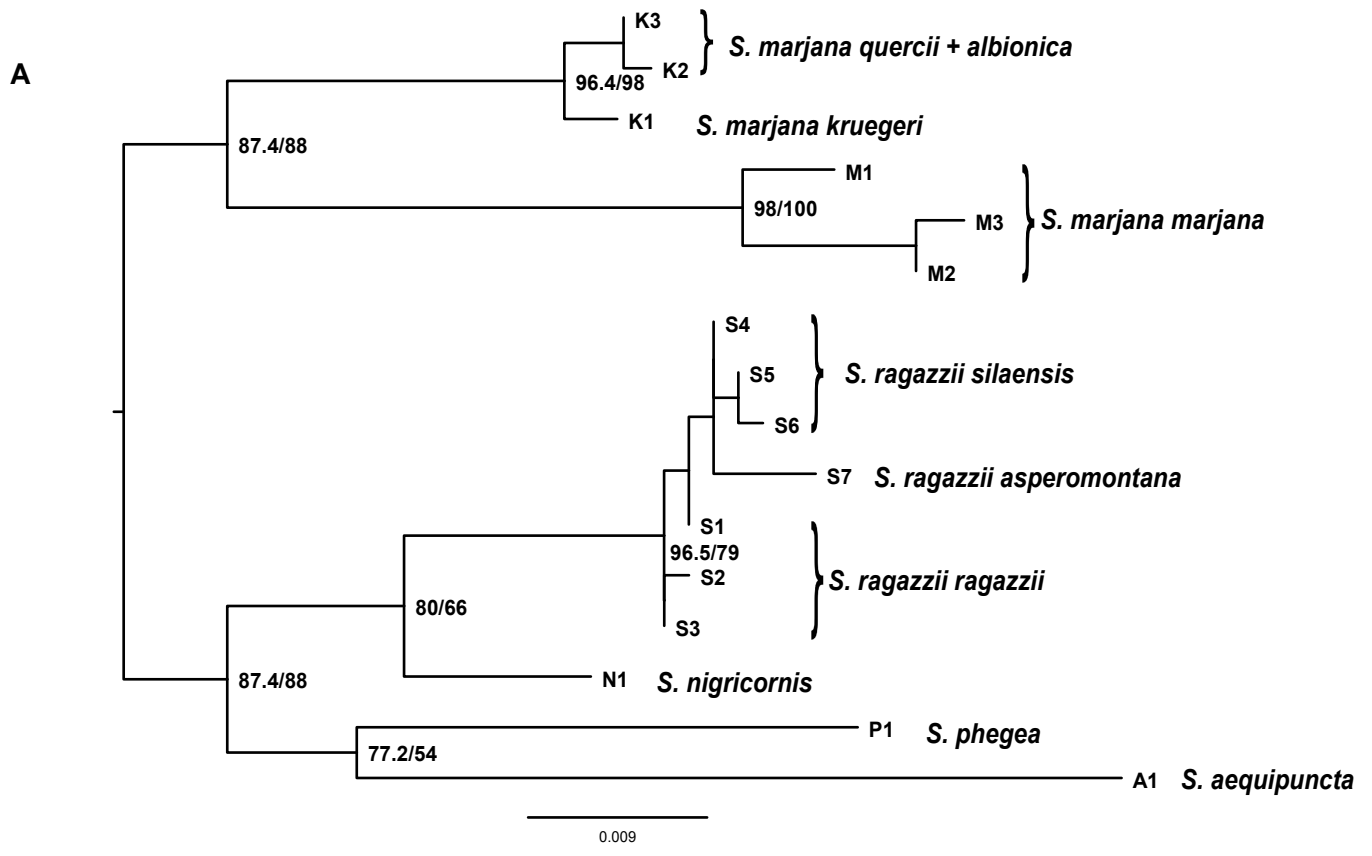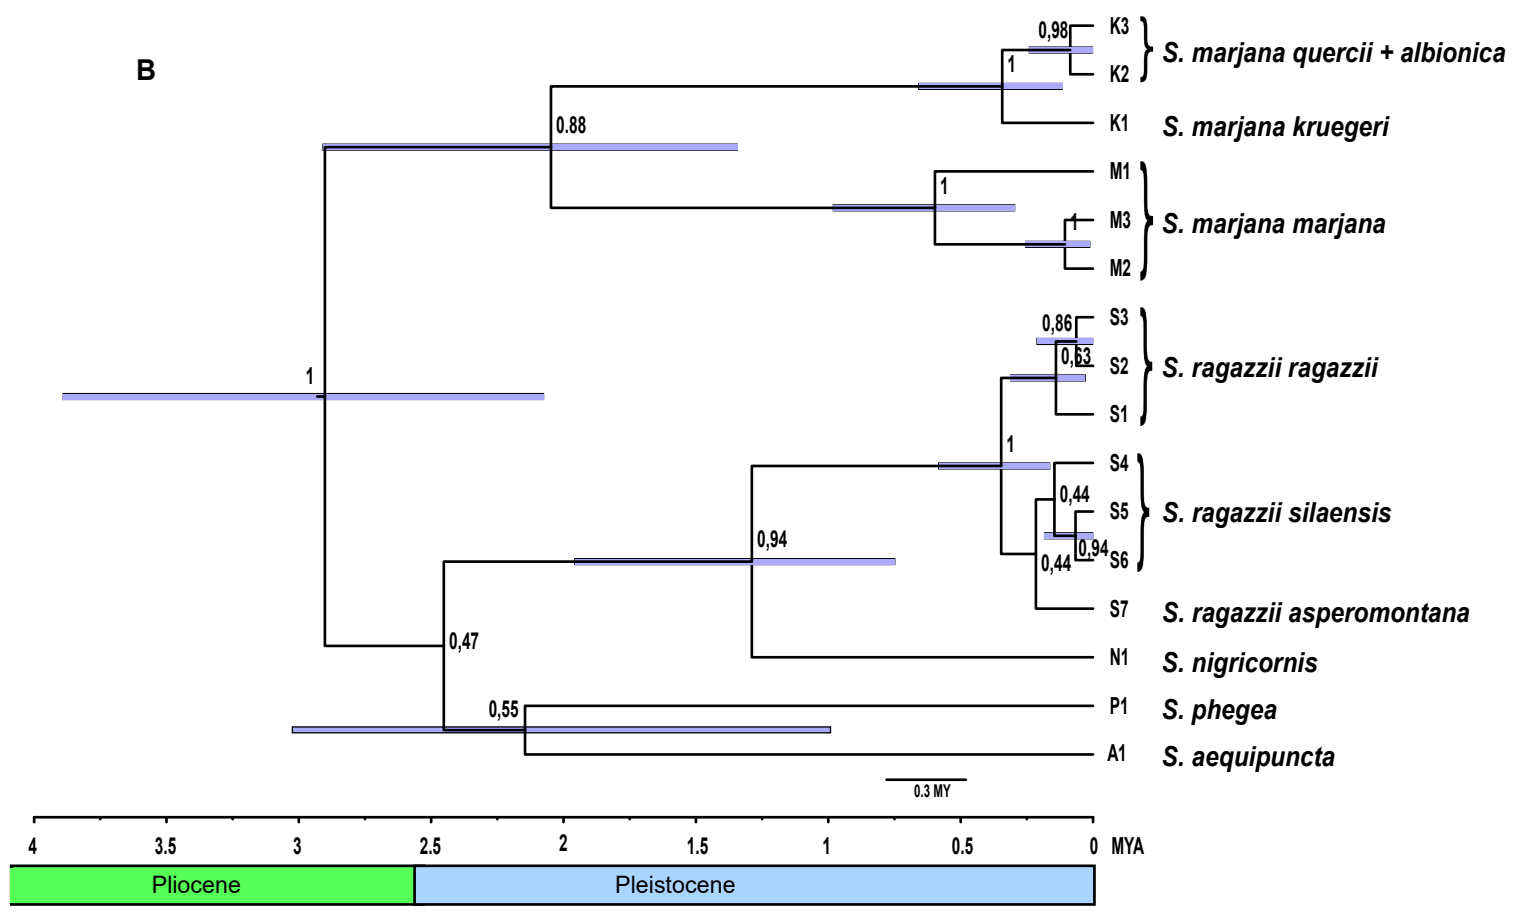

Source: https://www.biorxiv.org/content/10.1101/794602v1.full.pdf
